# Supplementary material for: Structural and Photophysical Trends in Rhenium(I) Carbonyl Complexes with 2,2′:6′,2″-Terpyridines
Source: MDPI journal article supplement (doi:10.3390/molecules29071631), 2024-04-05
Supplement: s1 [file s1]

## SUPPORTING INFORMATION

### Structural and photophysical trends in rhenium(I) carbonyl complexes with 2,2':6',2''-terpyridines

Joanna Palion-Gazda\*, Katarzyna Choroba, Anna Maria Maroń, Ewa Malicka, Barbara Machura\*

*Institute of Chemistry, University of Silesia, 9 Szkolna Str., 40-006 Katowice, Poland*

#### Table of contents

| Title                                                                                                                                                                                                                                                       | Number           |
|-------------------------------------------------------------------------------------------------------------------------------------------------------------------------------------------------------------------------------------------------------------|------------------|
| Selected bond lengths (Å) and angles (°) for [ReCl(CO) <sub>3</sub> (R-terpy-κ <sup>2</sup> N)].                                                                                                                                                            | <b>Table S1</b>  |
| Selected bond lengths (Å) and angles (°) for [Re(X/L)(CO) <sub>2</sub> (R-terpy-κ <sup>3</sup> N)] <sup>0/+</sup> .                                                                                                                                         | <b>Table S2</b>  |
| Selected bond lengths (Å) and angles (°) for [Re(X/L)(CO) <sub>3</sub> (R-terpy-κ <sup>2</sup> N)] <sup>0/+</sup> .                                                                                                                                         | <b>Table S3</b>  |
| The absorption and emission properties of [ReX(CO) <sub>3</sub> (bipy)].                                                                                                                                                                                    | <b>Table S4</b>  |
| The absorption and emission properties of compounds <b>1–7</b> (class A).                                                                                                                                                                                   | <b>Table S5</b>  |
| The absorption and emission properties of compounds <b>8–13</b> (class B).                                                                                                                                                                                  | <b>Table S6</b>  |
| The absorption and emission properties of compounds <b>14–29</b> (class C).                                                                                                                                                                                 | <b>Table S7</b>  |
| The absorption and emission properties of compounds <b>30–45</b> (class D).                                                                                                                                                                                 | <b>Table S8</b>  |
| The absorption and emission properties of [ReX(CO) <sub>2</sub> (R-terpy-κ <sup>3</sup> N)] (X = Cl, Br) (class E).                                                                                                                                         | <b>Table S9</b>  |
| The absorption and emission properties of [Re(X/L)(CO) <sub>3</sub> (R-terpy-κ <sup>2</sup> N)] <sup>0/+</sup> and [Re(X/L)(CO) <sub>2</sub> (R-terpy-κ <sup>3</sup> N)] <sup>0/+</sup> bearing the ancillary ligands different from halide ions (class F). | <b>Table S10</b> |
| Electrochemical data of [Re(X/L)(CO) <sub>3</sub> (R-terpy-κ <sup>2</sup> N)] <sup>0/+</sup> and [Re(X/L)(CO) <sub>2</sub> (R-terpy-κ <sup>3</sup> N)] <sup>0/+</sup> .                                                                                     | <b>Table S11</b> |
| The absorption and emission properties of higher nuclearity coordination compounds with photoactive {Re(CO) <sub>3</sub> (R-terpy-κ <sup>2</sup> N)} and {Re(CO) <sub>2</sub> (R-terpy-κ <sup>3</sup> N)} subunits (class G).                               | <b>Table S12</b> |

**Table S1.** Selected bond lengths (Å) and angles (°) for [ReCl(CO)<sub>3</sub>(R-terpy-κ<sup>2</sup>N)].

|                           | [ReCl(CO) <sub>3</sub> (R-terpy-κ <sup>2</sup> N)] |                      |           |                      |            |               |                        |            |            |                     |                    |                     |            |           |            |            |            |                     |
|---------------------------|----------------------------------------------------|----------------------|-----------|----------------------|------------|---------------|------------------------|------------|------------|---------------------|--------------------|---------------------|------------|-----------|------------|------------|------------|---------------------|
| Refcode*                  | BOFYIF                                             | DUZGAJ               | DUZGEN    | DUZGIR               | KAWBIX     | KUHMIM        | ONEZOY                 | ONEZUE     | ONIBAQ     | ONIBEU              | QIYSEZ             | RISKUC              | RISLEN     | SUZLOQ    | SUZLUW     | SUZMAD     | TACLIU     | WELHAY              |
| R**                       | Cl                                                 | CCl <sub>3</sub> -Ph | CN-Ph     | CH <sub>3</sub> O-Ph | Nap        | dimethoxy-nap | bph                    | Cl-Ph      | Br-Ph      | NH <sub>2</sub> -Ph | TXP-H <sub>2</sub> | pyrr-Ph             | Ph         | fur       | thp        | bthp       | OH         | N(Ph) <sub>2</sub>  |
| <b>Bond lengths</b>       |                                                    |                      |           |                      |            |               |                        |            |            |                     |                    |                     |            |           |            |            |            |                     |
| Re(1)–Cl(1)               | 2.4944(15)                                         | 2.4973(7)            | 2.4965(5) | 2.4990(5)            | 2.4848(12) | 2.4986(11)    | 2.4847(10)             | 2.4647(17) | 2.4596(17) | 2.4996(16)          | 2.4898(13)         | 2.4904(11)          | 2.4862(18) | 2.483(2)  | 2.4828(18) | 2.4929(18) | 2.5188(18) | 2.482(2)            |
| Re(1)–N(1)                | 2.210(4)                                           | 2.225(3)             | 2.223(2)  | 2.220(2)             | 2.218(2)   | 2.204(3)      | 2.217(3)               | 2.231(4)   | 2.227(6)   | 2.200(5)            | 2.210(3)           | 2.204(4)            | 2.223(4)   | 2.209(5)  | 2.219(4)   | 2.225(5)   | 2.217(6)   | 2.214(7)            |
| Re(1)–N(2)                | 2.161(5)                                           | 2.162(2)             | 2.158(1)  | 2.153(1)             | 2.164(3)   | 2.165(3)      | 2.160(3)               | 2.174(6)   | 2.165(7)   | 2.173(5)            | 2.159(3)           | 2.171(3)            | 2.178(5)   | 2.157(6)  | 2.170(5)   | 2.172(4)   | 2.151(7)   | 2.185(7)            |
| Re(1)–C(1)                | 1.902(6)                                           | 1.899(3)             | 1.904(2)  | 1.902(2)             | 1.948(5)   | 1.895(5)      | 1.919(5)               | 1.969(8)   | 1.949(9)   | 1.884(8)            | 1.941(5)           | 1.889(4)            | 1.883(8)   | 1.945(11) | 1.898(7)   | 1.918(9)   | 1.909(8)   | 1.878(10)           |
| Re(1)–C(2)                | 1.917(5)                                           | 1.914(3)             | 1.912(2)  | 1.914(2)             | 1.913(3)   | 1.895(6)      | 1.900(5)               | 1.897(8)   | 1.893(8)   | 1.921(8)            | 1.907(5)           | 1.895(8)            | 1.887(6)   | 1.898(8)  | 1.887(7)   | 1.912(8)   | 1.904(9)   | 1.885(10)           |
| Re(1)–C(3)                | 1.943(6)                                           | 1.936(3)             | 1.938(2)  | 1.931(2)             | 1.921(5)   | 1.915(4)      | 1.905(5)               | 1.928(8)   | 1.918(9)   | 1.925(8)            | 1.926(5)           | 1.915(5)            | 1.942(8)   | 1.925(10) | 1.920(8)   | 1.932(8)   | 1.929(10)  | 1.921(10)           |
| C(1)–O(1)                 | 1.162(8)                                           | 1.159(4)             | 1.153(3)  | 1.149(2)             | 1.077(7)   | 1.141(6)      | 1.222(6)               | 1.065(10)  | 1.063(11)  | 1.166(10)           | 1.127(6)           | 1.159(6)            | 1.157(9)   | 1.101(14) | 1.148(10)  | 1.123(12)  | 1.148(9)   | 1.878(10)           |
| C(2)–O(2)                 | 1.141(6)                                           | 1.151(4)             | 1.149(3)  | 1.147(3)             | 1.144(4)   | 1.150(8)      | 1.151(6)               | 1.158(10)  | 1.161(10)  | 1.130(12)           | 1.162(6)           | 1.157(10)           | 1.162(7)   | 1.149(10) | 1.152(8)   | 1.135(10)  | 1.157(11)  | 1.885(10)           |
| C(3)–O(3)                 | 1.136(7)                                           | 1.143(3)             | 1.146(2)  | 1.150(2)             | 1.149(6)   | 1.149(6)      | 1.153(6)               | 1.157(10)  | 1.164(12)  | 1.160(9)            | 1.144(6)           | 1.159(7)            | 1.136(10)  | 1.141(12) | 1.154(9)   | 1.140(9)   | 1.162(12)  | 1.921(10)           |
| <b>Bond angles</b>        |                                                    |                      |           |                      |            |               |                        |            |            |                     |                    |                     |            |           |            |            |            |                     |
| N(1)–Re(1)–Cl(1)          | 81.42(13)                                          | 80.83(6)             | 80.55(4)  | 80.85(4)             | 80.83(8)   | 82.48(8)      | 82.11(8)               | 85.41(12)  | 85.12(13)  | 81.13(13)           | 86.42(10)          | 81.60(8)            | 83.16(14)  | 83.35(16) | 83.62(14)  | 80.93(13)  | 82.35(16)  | 82.14(18)           |
| N(2)–Re(1)–Cl(1)          | 83.59(13)                                          | 83.73(7)             | 84.17(4)  | 86.32(4)             | 85.27(8)   | 84.38(8)      | 85.52(9)               | 84.62(13)  | 84.45(15)  | 83.71(14)           | 80.34(10)          | 83.84(8)            | 84.09(14)  | 83.10(17) | 83.28(14)  | 86.25(14)  | 82.93(17)  | 84.41(17)           |
| N(1)–Re(1)–N(2)           | 74.54(15)                                          | 74.56(8)             | 74.48(5)  | 74.52(6)             | 74.38(9)   | 74.87(11)     | 74.61(12)              | 75.0(2)    | 75.0(2)    | 74.0(2)             | 75.30(12)          | 74.21(14)           | 74.59(16)  | 74.74(19) | 74.44(16)  | 75.23(17)  | 74.9(3)    | 74.8(2)             |
| C(1)–Re(1)–Cl(1)          | 175.74(17)                                         | 178.16(10)           | 177.80(6) | 177.08(5)            | 177.28(13) | 178.96(17)    | 178.67(15)             | 175.2(3)   | 175.4(3)   | 177.8(2)            | 175.54(13)         | 178.08(18)          | 179.44(19) | 179.0(2)  | 178.4(2)   | 178.8(2)   | 178.2(3)   | 178.2(3)            |
| C(1)–Re(1)–N(1)           | 96.57(19)                                          | 99.85(12)            | 100.02(7) | 97.95(7)             | 96.99(13)  | 98.44(18)     | 96.56(16)              | 92.7(2)    | 92.5(3)    | 98.1(3)             | 89.18(15)          | 96.6(2)             | 96.3(2)    | 96.1(3)   | 96.2(2)    | 98.4(3)    | 96.0(3)    | 97.1(4)             |
| C(1)–Re(1)–N(2)           | 92.30(20)                                          | 94.79(10)            | 93.93(6)  | 90.80(6)             | 92.58(16)  | 96.32(18)     | 94.02(18)              | 90.7(3)    | 91.2(3)    | 94.1(3)             | 97.85(17)          | 95.09(17)           | 95.6(3)    | 95.9(3)   | 95.1(3)    | 92.6(3)    | 97.3(3)    | 93.9(4)             |
| C(2)–Re(1)–Cl(1)          | 92.47(19)                                          | 91.47(9)             | 91.73(6)  | 92.18(5)             | 91.21(14)  | 89.80(15)     | 91.10(14)              | 90.50(19)  | 90.7(2)    | 91.8(2)             | 96.04(18)          | 91.35(17)           | 93.5(2)    | 93.3(3)   | 93.5(3)    | 91.9(2)    | 94.7(2)    | 94.2(3)             |
| C(2)–Re(1)–N(1)           | 170.3(2)                                           | 169.09(10)           | 168.74(6) | 166.65(7)            | 168.36(19) | 168.65(16)    | 168.64(16)             | 169.5(3)   | 169.8(3)   | 168.4(3)            | 170.40(17)         | 168.8(2)            | 170.3(3)   | 171.1(3)  | 171.0(2)   | 168.6(2)   | 171.3(3)   | 172.2(3)            |
| C(2)–Re(1)–N(2)           | 97.33(19)                                          | 97.05(9)             | 96.72(6)  | 93.78(7)             | 96.63(15)  | 96.17(18)     | 95.86(16)              | 95.1(3)    | 95.3(3)    | 96.1(3)             | 95.92(17)          | 96.5(2)             | 96.1(2)    | 96.8(2)   | 96.8(2)    | 95.5(2)    | 96.7(3)    | 98.1(3)             |
| C(2)–Re(1)–C(1)           | 89.0(2)                                            | 87.63(14)            | 87.40(8)  | 88.46(8)             | 90.6(2)    | 89.4(2)       | 90.19(19)              | 90.6(3)    | 91.0(3)    | 88.6(3)             | 88.2(2)            | 90.4(3)             | 87.0(3)    | 87.1(4)   | 86.4(3)    | 88.5(4)    | 87.1(4)    | 86.4(4)             |
| C(2)–Re(1)–C(3)           | 86.0(2)                                            | 88.11(12)            | 88.57(7)  | 90.61(7)             | 87.80(18)  | 88.4(2)       | 90.8(2)                | 86.5(3)    | 86.5(4)    | 87.9(3)             | 85.68(19)          | 86.3(3)             | 87.4(3)    | 86.5(3)   | 86.8(3)    | 87.2(3)    | 86.8(4)    | 85.2(4)             |
| C(3)–Re(1)–Cl(1)          | 93.15(18)                                          | 91.75(10)            | 91.99(6)  | 92.25(5)             | 91.45(17)  | 91.06(12)     | 89.58(14)              | 90.96(18)  | 91.0(2)    | 93.6(2)             | 90.87(12)          | 93.56(12)           | 91.5(2)    | 92.8(3)   | 92.4(2)    | 89.8(3)    | 90.5(2)    | 97.7(3)             |
| C(3)–Re(1)–N(1)           | 101.85(18)                                         | 99.76(12)            | 99.80(7)  | 103.01(7)            | 100.80(14) | 99.98(16)     | 101.97(16)             | 103.2(2)   | 102.9(3)   | 101.7(3)            | 103.60(15)         | 102.71(19)          | 101.8(2)   | 101.9(2)  | 101.8(2)   | 101.69(3)  | 101.4(3)   | 101.7(3)            |
| C(3)–Re(1)–N(2)           | 175.44(19)                                         | 173.21(13)           | 173.54(8) | 177.31(7)            | 174.53(16) | 173.50(15)    | 174.36(16)             | 175.3(2)   | 175.1(3)   | 175.2(3)            | 171.17(15)         | 176.21(18)          | 174.6(2)   | 174.9(3)  | 174.5(2)   | 175.3(3)   | 172.8(3)   | 175.1(3)            |
| C(3)–Re(1)–C(1)           | 90.9(2)                                            | 88.11(12)            | 90.01(7)  | 90.61(7)             | 90.6(2)    | 88.3(2)       | 90.8(2)                | 93.7(3)    | 93.4(4)    | 88.6(3)             | 90.87(18)          | 87.42(19)           | 88.8(3)    | 88.2(3)   | 83.2(3)    | 91.4(3)    | 89.2(3)    | 90.0(4)             |
| <b>Dihedral angle**</b>   | 53.41(18)                                          | 43.48(9)             | 43.31(6)  | 47.86(6)             | 48.17(13)  | 50.96(17)     | 53.32(15)              | 61.8(2)    | 60.9(2)    | 50.0(2)             | 84.98(14)          | 63.93(18)           | 50.2(2)    | 51.8(2)   | 50.8(2)    | 53.9(3)    | 59.2(3)    | 54.3(3)             |
| <b>Dihedral angle****</b> | –                                                  | 27.82(10)            | 25.86(5)  | 20.96(5)             | 35.64(13)  | 33.54(15)     | 22.64(13)<br>37.74(15) | 19.9(3)    | 18.9(3)    | 19.5(2)             | 39.82(14)          | 13.89(15)<br>3.9(2) | 10.8(3)    | 4.0(3)    | 6.4(2)     | 15.7(2)    | -          | 104.2(4)<br>62.4(3) |

\* Refcode in the Cambridge Structural Database [1]

\*\* Ph – phenyl, Nap – naphthalen, bph – biphenyl, TXP-H<sub>2</sub> – 5-[4-(2,7-di-tert-butyl-9,9-dimethylxanthenyl)]-10,20-bis(mesityl)porphyrin, pyrr – pyrrolidine, fur – furan, thp – thiophene, bthp – 2,2'-bithiophene.

\*\*\* Dihedral angle between the least squares planes of the central pyridine and pendant pyridyl group.

\*\*\*\* Dihedral angle between the least squares planes of the central pyridine and introduced R substituent.

**Table S2.** Selected bond lengths (Å) and angles (°) for [Re(X/L)(CO)<sub>2</sub>(R-terpy-κ<sup>3</sup>N)]<sup>0/+</sup>.

|                    | [Re(X/L)(CO) <sub>2</sub> (R-terpy-κ <sup>3</sup> N)] <sup>0/+</sup> |                      |            |
|--------------------|----------------------------------------------------------------------|----------------------|------------|
| Refcode*           | QADLEQ                                                               | QADLIU               | SOTBEK     |
| X/L                | Cl                                                                   | Cl                   | pyridine   |
| R                  | N(CH <sub>3</sub> ) <sub>2</sub> -Ph                                 | CCl <sub>3</sub> -Ph | 4-pyridine |
| Bond lengths       |                                                                      |                      |            |
| Re(1)–X(1)         | 2.527(2)                                                             | 2.5158(18)           | 2.242(3)   |
| Re(1)–N(1)         | 2.124(5)                                                             | 2.072(4)             | 2.056(2)   |
| Re(1)–N(2)         | 2.144(5)                                                             | 2.129(4)             | 2.137(2)   |
| Re(1)–N(3)         | 2.164(5)                                                             | 2.131(4)             | 2.129(2)   |
| Re(1)–C(1)         | 1.826(11)                                                            | 1.849(10)            | 1.883(3)   |
| Re(1)–C(2)         | 1.917(6)                                                             | 1.917(6)             | 1.911(3)   |
| C(1)–O(1)          | 1.223(12)                                                            | 1.191(11)            | 1.171(4)   |
| C(2)–O(2)          | 1.160(7)                                                             | 1.154(7)             | 1.159(4)   |
| Bond angles        |                                                                      |                      |            |
| N(1)–Re(1)–X(1)    | 94.35(17)                                                            | 82.98(13)            | 84.39(8)   |
| N(2)–Re(1)–X(1)    | 95.55(18)                                                            | 85.82(13)            | 82.78(9)   |
| N(3)–Re(1)–X(1)    | 98.78(16)                                                            | 86.63(12)            | 88.87(9)   |
| N(1)–Re(1)–N(2)    | 75.4(2)                                                              | 76.52(17)            | 76.39(6)   |
| N(1)–Re(1)–N(3)    | 74.48(19)                                                            | 76.47(18)            | 76.31(6)   |
| N(2)–Re(1)–N(3)    | 147.4(3)                                                             | 152.64(16)           | 152.08(6)  |
| C(1)–Re(1)–X(1)    | 176.5(4)                                                             | 177.8(2)             | 177.42(10) |
| C(1)–Re(1)–N(1)    | 86.4(4)                                                              | 99.2(3)              | 97.16(11)  |
| C(1)–Re(1)–N(2)    | 81.3(4)                                                              | 94.5(3)              | 95.57(11)  |
| C(1)–Re(1)–N(3)    | 84.8(4)                                                              | 94.1(3)              | 93.49(10)  |
| C(2)–Re(1)–X(1)    | 87.7(2)                                                              | 89.2(2)              | 93.04(13)  |
| C(2)–Re(1)–N(1)    | 170.2(2)                                                             | 172.1(2)             | 177.18(12) |
| C(2)–Re(1)–N(2)    | 104.8(2)                                                             | 103.5(2)             | 104.47(10) |
| C(2)–Re(1)–N(3)    | 101.2(2)                                                             | 102.6(2)             | 102.53(10) |
| C(2)–Re(1)–C(1)    | 91.7(4)                                                              | 88.7(3)              | 85.45(14)  |
| Dihedral angle D–A | 12.8(2)                                                              | 18.0(2)              | 12.43(7)   |

\* Refcode in the Cambridge Structural Database [1]

**Table S3.** Selected bond lengths (Å) and angles (°) for [Re(X/L)(CO)<sub>3</sub>(R-terpy-κ<sup>2</sup>N)]<sup>0/+</sup>.

|                     | [ReX(CO) <sub>3</sub> (R-terpy-κ <sup>2</sup> N)] <sup>0/+</sup> |              |                    |            |            |
|---------------------|------------------------------------------------------------------|--------------|--------------------|------------|------------|
| Refcode*            | ALAXOD                                                           | EKOBIS       | NABYIA             | TACLEQ     | YASTEU     |
| X/L**               | N <sub>3</sub> <sup>−</sup>                                      | R-triazolate | CH <sub>3</sub> CN | Br         | py         |
| R***                | mor                                                              | 2-py         | H                  | OH         | 4-py       |
| Bond lengths        |                                                                  |              |                    |            |            |
| Re(1)–X(1)          | 2.207(2)                                                         | 2.174(3)     | 2.145(7)           | 2.6570(5)  | 2.209(2)   |
| Re(1)–N(1)          | 2.207(2)                                                         | 2.208(2)     | 2.213(6)           | 2.216(3)   | 2.213(2)   |
| Re(1)–N(2)          | 2.161(3)                                                         | 2.165(2)     | 2.163(8)           | 2.165(3)   | 2.166(2)   |
| Re(1)–C(1)          | 1.908(3)                                                         | 1.914(3)     | 1.923(9)           | 1.906(5)   | 1.937(3)   |
| Re(1)–C(2)          | 1.916(3)                                                         | 1.899(3)     | 1.922(10)          | 1.904(4)   | 1.915(3)   |
| Re(1)–C(3)          | 1.925(3)                                                         | 1.939(3)     | 1.933(9)           | 1.933(4)   | 1.931(2)   |
| C(1)–O(1)           | 1.152(3)                                                         | 1.153(4)     | 1.148(11)          | 1.143(6)   | 1.145(4)   |
| C(2)–O(2)           | 1.146(4)                                                         | 1.156(3)     | 1.143(12)          | 1.154(6)   | 1.148(3)   |
| C(3)–O(3)           | 1.155(4)                                                         | 1.147(3)     | 1.163(12)          | 1.143(5)   | 1.145(3)   |
| Bond angles         |                                                                  |              |                    |            |            |
| N(1)–Re(1)–X(1)     | 79.70(8)                                                         | 84.45(9)     | 81.0(3)            | 84.30(9)   | 86.19(8)   |
| N(2)–Re(1)–X(1)     | 82.54(9)                                                         | 88.29(9)     | 82.2(3)            | 84.53(9)   | 84.17(8)   |
| N(1)–Re(1)–N(2)     | 74.42(9)                                                         | 74.30(8)     | 75.1(3)            | 74.95(11)  | 74.45(8)   |
| C(1)–Re(1)–X(1)     | 178.31(11)                                                       | 178.47(9)    | 174.7(3)           | 178.66(11) | 176.56(10) |
| C(1)–Re(1)–N(1)     | 99.05(10)                                                        | 95.9(1)      | 94.2(3)            | 95.36(16)  | 90.54(10)  |
| C(1)–Re(1)–N(2)     | 96.03(11)                                                        | 93.25(10)    | 94.4(3)            | 96.64(15)  | 93.98(11)  |
| C(2)–Re(1)–X(1)     | 94.51(10)                                                        | 90.33(11)    | 95.4(4)            | 90.92(15)  | 93.38(10)  |
| C(2)–Re(1)–N(1)     | 170.77(11)                                                       | 167.62(11)   | 169.1(4)           | 170.19(14) | 171.74(9)  |
| C(2)–Re(1)–N(2)     | 97.81(11)                                                        | 94.37(9)     | 94.2(4)            | 96.10(14)  | 96.30(9)   |
| C(2)–Re(1)–C(1)     | 86.58(12)                                                        | 89.61(12)    | 88.9(4)            | 89.6(2)    | 89.70(12)  |
| C(2)–Re(1)–C(3)     | 87.27(12)                                                        | 87.07(11)    | 87.5(4)            | 86.33(17)  | 84.99(10)  |
| C(3)–Re(1)–X(1)     | 92.37(11)                                                        | 88.60(11)    | 94.0(3)            | 92.25(15)  | 91.719(10) |
| C(3)–Re(1)–N(1)     | 100.07(10)                                                       | 103.97(10)   | 103.0(3)           | 102.38(14) | 103.26(9)  |
| C(3)–Re(1)–N(2)     | 173.05(10)                                                       | 176.57(12)   | 175.9(3)           | 175.98(16) | 175.74(10) |
| C(3)–Re(1)–C(1)     | 88.98(12)                                                        | 89.87(12)    | 89.3(4)            | 86.56(19)  | 90.08(12)  |
| Dihedral angle****  | 56.96(9)                                                         | 65.62(9)     | 60.3(3)            | 62.64(16)  | 79.18(9)   |
| Dihedral angle***** | 15.08(9)                                                         | 9.4(1)       | –                  | –          | 33.68(9)   |

\* Refcode in the Cambridge Structural Database [1]

\*\* R-triazolate = 4-(ethoxycarbonyl)-5-(trifluoromethyl)-1,2,3-triazol-2-ate,

\*\*\* mor – morpholine, py – pyridine,

\*\*\*\* Dihedral angle between the least squares planes of the central pyridine and pendant pyridyl group.

\*\*\*\*\* Dihedral angle between the least squares planes of the central pyridine and introduced R substituent.

**Table S4.** The absorption and emission properties of [ReX(CO)<sub>3</sub>(bipy)] (X = Cl, Br).

| [ReCl(CO) <sub>3</sub> (bipy)]          |                           |                  |                 |         |                    |           |
|-----------------------------------------|---------------------------|------------------|-----------------|---------|--------------------|-----------|
| medium                                  | λ <sub>abs</sub>          | λ <sub>exc</sub> | λ <sub>PL</sub> | τ       | φ <sub>PL</sub> /% | Reference |
| DMF                                     | 373, 293                  | —                | 606             | —       | —                  | [2]       |
| CH <sub>2</sub> Cl <sub>2</sub>         | 387, 294, 239             | —                | —               | —       | —                  | [3]       |
| N,N-dimethylacetamide                   | —                         | —                | 607             | —       | —                  |           |
| H <sub>2</sub> O–dioxane 1:4 (v:v)      | 368                       | —                | 605             | 29 ns   | 0.4                | [4]       |
| H <sub>2</sub> O–dioxane 1:4 (v:v) 77 K | —                         | —                | 536             | 2.9 μs  | —                  |           |
| MeCN                                    | 371                       | —                | 633             | —       | 0.27               | [5]       |
| 77K 2-MeTHF                             | —                         | —                | —               | 3.17 μs | —                  |           |
| DMF–MeOH                                | 294, 317, 371             | —                | 598             | —       | 0.23               | [6]       |
| MeCN                                    | —                         | —                | 611             | 29 ns   | 0.2                | [7]       |
| CHCl <sub>3</sub>                       | —                         | 393, 316sh, 295  | 622             | 51.0 ns | 1.65               | [8]       |
| MeCN                                    | 381, 332, 290             | 369, 299         | 639             | 26.4 ns | 0.71               |           |
| Solid                                   | —                         | 471              | 584             | 0.6 μs  | —                  | [9]       |
| MeCN                                    | 371, 291                  | —                | —               | —       | —                  |           |
| MeCN                                    | 384, 295                  | —                | —               | —       | —                  | [10]      |
| CH <sub>2</sub> Cl <sub>2</sub>         | 390, 290                  | —                | 620             | 45 ns   | —                  |           |
| EtOH                                    | 365, 315, 290             | —                | 620             | 24 ns   | —                  | [11]      |
| EtOH 77 K                               | —                         | —                | 530             | 2.8 μs  | —                  |           |
| MeCN                                    | 370                       | —                | 612             | 25 ns   | —                  | [12]      |
| CH <sub>2</sub> Cl <sub>2</sub>         | 384                       | —                | 612             | 50 ns   | —                  |           |
| DMF                                     | 373                       | —                | 610             | 26 ns   | —                  | [13]      |
| EtOH                                    | 372                       | —                | 604             | 36 ns   | —                  |           |
| THF                                     | 388                       | —                | 614             | 65 ns   | —                  | [14]      |
| dioxane                                 | 390                       | —                | 614             | 62 ns   | —                  |           |
| benzene                                 | 400                       | —                | 612             | 70 ns   | —                  | [15]      |
| CH <sub>2</sub> Cl <sub>2</sub>         | 386, 320sh, 294, 256, 242 | —                | 622             | 50 ns   | —                  |           |
| 77K EtOH–MeOH                           | —                         | —                | 550             | 2.78 μs | —                  | [16]      |
| EtOH                                    | —                         | —                | 612             | —       | —                  |           |
| EtOH 175 K                              | —                         | —                | 529             | —       | —                  | [17]      |
| 2-MeTHF 80 K                            | 375                       | —                | 532             | 2.7 μs  | 2.8                |           |
| THF                                     | 389                       | —                | 612             | 45 ns   | —                  | [18]      |
| DMF                                     | 370                       | 370              | 574             | 46.6 ns | —                  |           |
| CH <sub>2</sub> Cl <sub>2</sub>         | —                         | —                | 642             | 39 ns   | 0.31               | [19]      |
| CH <sub>2</sub> Cl <sub>2</sub>         | 385                       | 385              | 600             | 51 ns   | 0.5                | [20]      |
| DMF                                     | 370                       | —                | 580             | —       | —                  | [21]      |
| DMF                                     | 500, 466, 443, 400, 373   | —                | —               | —       | —                  | [22]      |
| [ReBr(CO) <sub>3</sub> (bipy)]          |                           |                  |                 |         |                    |           |
| medium                                  | λ <sub>abs</sub>          | λ <sub>exc</sub> | λ <sub>PL</sub> | τ       | φ <sub>PL</sub> /% | Reference |
| DMF                                     | 370                       | —                | 575             | —       | —                  | [23]      |
| MeCN                                    | 376                       | —                | 610             | 25 ns   | —                  | [24]      |
| MeCN                                    | 294, 304, 317, 377        | 380              | 579             | —       | 0.78               | [25]      |
| toluene                                 | 301, 410                  | —                | 614             | 90 ns   | 2                  | [26]      |
| DMF                                     | 580, 473, 443, 400, 373   | —                | —               | —       | —                  | [27]      |
| THF                                     | 392                       | —                | —               | —       | —                  | [28]      |
| 2-MeTHF 80 K                            | 378                       | —                | 530             | 3.7 μs  | 4.88               |           |
| DMF                                     | —                         | —                | 610             | 55 ns   | —                  | [29]      |
| DMF                                     | 375                       | —                | 600             | 4.2 ns  | —                  | [30]      |

**Table S5.** The absorption and emission properties of compounds **1–7** (class A).

| <div style="text-align: center;"> <b>CLASS A</b><br/> 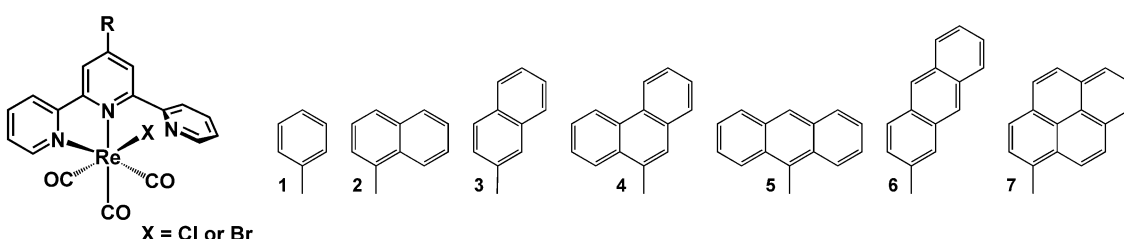 <br/> X = Cl or Br </div> |                             |                                                                                                                |                        |                       |                                                              |                     |                       |           |
|--------------------------------------------------------------------------------------------------------------------------------------------------------------------|-----------------------------|----------------------------------------------------------------------------------------------------------------|------------------------|-----------------------|--------------------------------------------------------------|---------------------|-----------------------|-----------|
| Compound                                                                                                                                                           | medium                      | $\lambda_{\text{abs}}/\text{nm}$<br>( $10^4 \epsilon/\text{dm}^3 \cdot \text{mol}^{-1} \cdot \text{cm}^{-1}$ ) | $\lambda_{\text{exc}}$ | $\lambda_{\text{PL}}$ | $\tau$                                                       | $\tau_{\text{av}}$  | $\Phi_{\text{PL}}/\%$ | Reference |
| <b>1<sup>Cl</sup></b>                                                                                                                                              | 77K<br>(EtOH/MeOH)<br>(DMF) | –                                                                                                              | 384                    | 543<br>570            | 2.28 $\mu\text{s}$ (22.41 %), 5.88 $\mu\text{s}$ (77.59 %)   | 5.07 $\mu\text{s}$  |                       | [25–28]   |
|                                                                                                                                                                    | solid                       | –                                                                                                              | 442                    | 592                   | 30.04 ns (65.78 %), 94.89 ns (34.22 %)                       | 52.2 ns             | 1.2                   |           |
|                                                                                                                                                                    | CHCl <sub>3</sub>           | 397 (0.28), 297 (1.60), 264 (1.82)<br>398 (0.27)                                                               | 400                    | 667                   | 3.27 ns (71.01 %), 28.45 ns (28.99 %)                        | 10.6 ns             | 0.4                   |           |
|                                                                                                                                                                    | THF                         | 400 (0.31)                                                                                                     | 400                    | 676                   | 1.98 ns (61.56%), 19.52 ns (38.44%)                          | 8.7 ns              | 0.2                   |           |
|                                                                                                                                                                    | DMF                         | 385 (0.51)<br>380<br>382, 331                                                                                  | 385                    | 665<br>652            | 1.77 ns (56.75 %), 16.61 ns (43.25 %)                        | 7.2 ns<br>1.5 ns    | 0.2                   |           |
|                                                                                                                                                                    | MeCN                        | 374 (0.46), 324 (1.34), 293 (2.54), 260 (2.84), 218 (2.94)<br>375 (0.46)                                       | 380                    | 666                   | 2.18 ns (71.42 %), 16.01 ns (28.58 %)                        | 6.1 ns              | 0.2                   |           |
| <b>1<sup>Br</sup></b>                                                                                                                                              | MeCN                        | 386 (0.37), 328 (1.28sh), 266 (2.55), 218 (3.28sh)<br>380 (0.71), 266 (4.76)                                   |                        | 527, 653              | 2.5 ns (65%), 38.00 (35%)                                    | 14.9 ns             | 0.1                   | [29,30]   |
|                                                                                                                                                                    | DMF                         | 384 (0.93)                                                                                                     |                        |                       |                                                              |                     |                       | [30]      |
| <b>2<sup>Cl</sup></b>                                                                                                                                              | 77K (BuCN)                  | –                                                                                                              | 420                    | 522/558               | 4.93 $\mu\text{s}$ (21.55 %), 316.31 $\mu\text{s}$ (78.45 %) | 249.2 $\mu\text{s}$ |                       | [31]      |
|                                                                                                                                                                    | solid                       | –                                                                                                              | 420                    | 628                   | 28.75 ns (25.45 %), 208.62 ns (74.55 %)                      | 162.8 ns            | 4.8                   |           |
|                                                                                                                                                                    | CHCl <sub>3</sub>           | 399 (1.03), 305 (4.82)                                                                                         | 420                    | 660                   | 3.55 ns (86.12 %), 24.85 ns (13.88 %)                        | 6.5 ns              | 7.7                   |           |
|                                                                                                                                                                    | MeCN                        | 380 (1.14), 301 (4.25)                                                                                         | 410                    | 654                   | 2.43 ns (82.81 %), 14.54 ns (17.19 %)                        | 4.5 ns              | 1.9                   |           |
| <b>3<sup>Cl</sup></b>                                                                                                                                              | 77K (BuCN)                  | –                                                                                                              | 420                    | 518, 556              | 18.61 $\mu\text{s}$ (29.81 %), 12.83 $\mu\text{s}$ (70.19 %) | 95.6 $\mu\text{s}$  | –                     |           |
|                                                                                                                                                                    | solid                       | –                                                                                                              | 400                    | 578                   | 46.32 ns (19.72 %), 115.94 ns (80.28%)                       | 102.2 ns            | 1.6                   |           |
|                                                                                                                                                                    | CHCl <sub>3</sub>           | 404 (0.62), 313 (2.82), 269 (3.66)                                                                             | 450                    | 645                   | 3.64 ns (89.28 %), 26.89 ns (10.72 %)                        | 6.1 ns              | 9.8                   |           |
|                                                                                                                                                                    | MeCN                        | 382 (0.83), 314 (2.84), 266 (3.86)                                                                             | 405                    | 663                   | 2.82 ns (92.03 %), 18.08 ns (7.97 %)                         | 4.0 ns              | 1.01                  |           |
| <b>4<sup>Cl</sup></b>                                                                                                                                              | 77K (BuCN)                  | –                                                                                                              | 420                    | 522sh, 558            | 1.10 $\mu\text{s}$ (39.61 %), 172.52 $\mu\text{s}$ (60.39 %) | 104.6 $\mu\text{s}$ | –                     |           |
|                                                                                                                                                                    | solid                       | –                                                                                                              | 370                    | 619                   | 17.06 ns (70.13 %), 63.34 ns (29.87 %)                       | 13.0 ns             | 0.6                   |           |
|                                                                                                                                                                    | CHCl <sub>3</sub>           | 401 (1.27), 300 (6.21), 260 (12.53), 254 (13.79)                                                               | 440                    | 665                   | 3.35 ns (94.69 %), 20.00 ns (5.31 %)                         | 4.2 ns              | 6.8                   |           |

|                 |                   |                                                                                   |     |                   |                                                                                                 |                    |             |      |
|-----------------|-------------------|-----------------------------------------------------------------------------------|-----|-------------------|-------------------------------------------------------------------------------------------------|--------------------|-------------|------|
|                 | MeCN              | 376 (1.47), 297 (5.32), 257 (11.53), 251 (13.00)                                  | 410 | 641               | 2.55 ns (92.56 %), 9.43 ns (7.44%)                                                              | 3.1 ns             | 0.6         |      |
| 5 <sup>Cl</sup> | 77K (BuCN)        | –                                                                                 | 430 | 587<br>688,761    | 2.35 μs (88.92 %), 13.00 μs (11.08 %)<br>12.07 ms                                               | 3.6 μs<br>12.1 ms  | –           | [32] |
|                 | solid             | –                                                                                 | –   | –                 | –                                                                                               | –                  | –           |      |
|                 | CHCl <sub>3</sub> | 416 (0.67), 386 (0.97), 368 (0.91), 351 (0.77), 308 (1.98), 258 (9.25)            | 445 | 511               | 0.90 ns (79.08 %), 7.43 ns (20.92 %)                                                            | 4.9 ns             | 3.8         |      |
|                 | MeCN              | 407 (0.41), 384 (0.74), 365 (0.69), 348 (0.56), 311 (1.27), 252 (8.80)            | 430 | 627               | 1.35 ns (18.16 %), 5.71 ns (81.84 %)                                                            | 2.3 ns             | 4.1         |      |
|                 | DMSO              | 406 (0.57), 388 (0.90), 368 (0.91), 349 (0.76), 328 (1.40), 316 (1.53), 260(5.33) | 430 | 627<br>711        | 0.35 ns (43.93 %), 2.53 ns (33.83 %), 8.19 ns (22.24 %)<br>410 ns (59.61 %), 34.75 μs (40.39 %) | 2.8 ns<br>14.30 μs | 0.02        |      |
| 6 <sup>Cl</sup> | 77K (BuCN)        | –                                                                                 | 470 | 707,784           | 2.59 ms                                                                                         | 2.59 ms            | –           | [31] |
|                 | solid             | –                                                                                 | –   | –                 | –                                                                                               | –                  | –           |      |
|                 | CHCl <sub>3</sub> | 423 (0.91), 312 (3.55), 259 (4.56)                                                | 450 | 580               | 7.30 ns                                                                                         | 7.3 ns             | 1.8         |      |
|                 | MeCN              | 412 (0.83), 305 (3.38), 292 (2.43), 250 (4.82)                                    | 430 | 608               | 0.57 ns (61.35 %), 9.37 ns (38.65 %)                                                            | 4.0 ns             | 0.05        |      |
|                 | DMSO              | 421 (0.58), 360 (1.00), 312 (2.43), 262 (2.75)                                    | 430 | 593<br>712        | 0.30 ns (10.40 %), 6.38 ns (89.60 %)<br>250 ns (49.96 %), 45.13 μs (50.04 %)                    | 5.7 ns<br>22.70 μs | 1.4         |      |
| 7 <sup>Cl</sup> | 77K (BuCN)        | –                                                                                 | 440 | 627,680,756       | 3.22 ms (32.64 %), 6.91 ms (67.36 %)                                                            | 5.74 ms            | –           | [31] |
|                 | solid             | –                                                                                 | –   | –                 | –                                                                                               | –                  | –           |      |
|                 | CHCl <sub>3</sub> | 409 (1.44), 321 (2.66), 306(2.78), 274 (3.45)                                     | 450 | 500<br>650, 696sh | 1.72 ns (11.06 %), 5.02 ns (88.94 %)<br>4.4 μs                                                  | 4.6 ns<br>4.4 μs   | <0.1<br>7.6 |      |
|                 | MeCN              | 395 (1.59), 324 (2.74), 272 (3.58)                                                | 420 | 620               | 2.50 ns (82.36%), 6.68 ns (17.64 %)                                                             | 3.3 ns             | 6.1         |      |
|                 |                   |                                                                                   |     |                   |                                                                                                 |                    |             |      |

**Table S6.** The absorption and emission properties of compounds **8–13** (class B).

| <p style="text-align: center;">CLASS B</p> 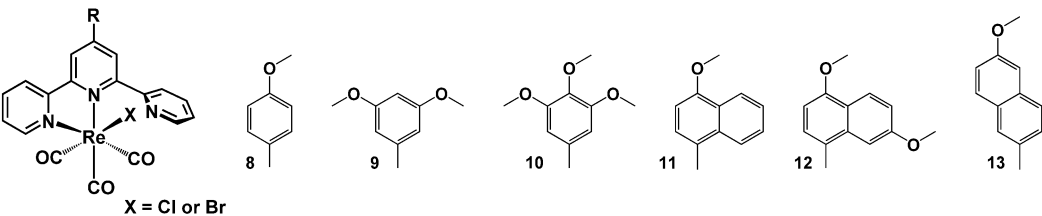 <p style="text-align: center;">X = Cl or Br</p> |                          |                                                                                                             |                        |                       |                                            |                    |                       |           |
|--------------------------------------------------------------------------------------------------------------------------------------------------------------------------------|--------------------------|-------------------------------------------------------------------------------------------------------------|------------------------|-----------------------|--------------------------------------------|--------------------|-----------------------|-----------|
| Compound                                                                                                                                                                       | medium                   | $\lambda_{\text{abs}}/\text{nm}$ ( $10^4 \epsilon/\text{dm}^3 \cdot \text{mol}^{-1} \cdot \text{cm}^{-1}$ ) | $\lambda_{\text{exc}}$ | $\lambda_{\text{PL}}$ | $\tau$                                     | $\tau_{\text{av}}$ | $\Phi_{\text{PL}}/\%$ | Reference |
| 8 <sup>Cl</sup>                                                                                                                                                                | 77K (EtOH/MeOH)<br>(DMF) | –<br>–                                                                                                      | 368, 337, 306<br>–     | 505, 533<br>562       | 6.50 μs (70.03 %), 15.62 μs (29.97 %)<br>– | 9.23 μs<br>–       | –<br>–                | [27,33]   |
|                                                                                                                                                                                | solid                    |                                                                                                             | 481, 430, 304,<br>265  | 584                   | 586.83 ns                                  | 586.83 ns          | 31                    |           |
|                                                                                                                                                                                | CHCl <sub>3</sub>        | 388 (0.83), 311 (3.35), 284 (2.87)                                                                          | 381, 343, 298,<br>267  | 647                   | 4.82 ns (82.52 %), 277.80 ns (16.48%)      | 49.76 ns           | 0.2                   |           |
|                                                                                                                                                                                | MeCN                     | 365 (1.30), 318 (3.44), 303 (3.39), 278 (3.01), 223 (4.05)                                                  | 370, 337, 301,<br>260  | 661                   | 2.95 ns                                    | 2.95 ns            | 0.2                   |           |
|                                                                                                                                                                                | DMF                      | 378                                                                                                         | –                      | 647                   | –                                          | 2.30 ns            | –                     |           |

|                        |                   |                                                                                                    |                    |               |                                         |           |      |         |
|------------------------|-------------------|----------------------------------------------------------------------------------------------------|--------------------|---------------|-----------------------------------------|-----------|------|---------|
| <b>9<sup>Cl</sup></b>  | solid             | –                                                                                                  | 457                | 600           | 23.92 ns (33.42 %), 93.97 ns (66.58 %)  | 70.56 ns  | 1.4  | [34]    |
|                        | CHCl <sub>3</sub> | 395 (0.51), 305 (3.10), 276 (2.74), 264 (2.77), 240 (3.25)                                         | 393, 315, 258      | 660           | 3.08 ns                                 | 3.08 ns   | 0.1  |         |
|                        | MeCN              | 370 (0.63), 299 (2.85), 275 (2.81), 220 (4.52), 208 (4.64)                                         | 370, 273           | 672           | 1.99 ns (82.86 %), 4.67 ns (17.14 %)    | 2.45 ns   | 0.5  |         |
| <b>10<sup>Cl</sup></b> | solid             | –                                                                                                  | 462, 380, 265      | 580           | 67.87 ns (4.28 %), 466.79 ns (95.72 %)  | 449.72 ns | 16.3 | [34]    |
|                        | CHCl <sub>3</sub> | 393 (0.89), 306 (3.38), 241 (3.73)                                                                 | 393, 317           | 657           | 3.86 ns                                 | 3.86 ns   | 1.3  |         |
|                        | MeCN              | 376 (1.70), 295 (4.82), 244 (5.26), 209 (8.92)                                                     | 369, 285           | 666           | 2.14 ns                                 | 2.14 ns   | 1.1  |         |
| <b>11<sup>Cl</sup></b> | 77K (EtOH/MeOH)   | –                                                                                                  | 264, 316, 389      | 536, 568      | 144.42 μs (22.74%), 465.27 μs (77.26 %) | 392.31 μs | –    | [33,35] |
|                        | solid             | –                                                                                                  | 471                | 574           | 9.54 μs (87.12 %), 2.40 μs (12.88 %)    | 8.62 μs   | 1.2  |         |
|                        | CHCl <sub>3</sub> | 384 (0.90), 306 (2.34), 241 (3.93)                                                                 | 384                | 658           | 4.38 ns                                 | 4.38 ns   | 0.4  |         |
|                        | MeCN              | 374 (4.23), 306 (9.07), 231 (18.4), 206 (23.51)                                                    | 375                | 650           | 0.66 ns (16.91 %), 4.77 ns (83.09 %)    | 4.22 ns   | 0.5  |         |
| <b>12<sup>Cl</sup></b> | solid             | –                                                                                                  | 477, 326           | 633           | 39.66 ns (48.33%), 137.77 ns (51.67%)   | 90.35 ns  | 0.6  | [34]    |
|                        | CHCl <sub>3</sub> | 399 (1.87), 305 (4.67), 248 (9.10)                                                                 | 399, 302, 260      | 654           | 4.14 ns (89.72%), 30.36 ns (10.28%)     | 6.84 ns   | 0.6  |         |
|                        | MeCN              | 387 (1.93), 305 (4.01), 248 (8.26), 220 (10.02)                                                    | 387, 303, 239      | 656           | 2.88 ns (48.14%), 7.13 ns (51.86%)      | 5.08 ns   | 0.7  |         |
| <b>13<sup>Cl</sup></b> | 77K (EtOH/MeOH)   | –                                                                                                  | 389, 350, 330, 314 | 525, 565, 605 | 56.79 μs (38.95 %), 182.98 μs (61.05 %) | 133.83 μs | –    | [33]    |
|                        | solid             | –                                                                                                  | 489, 452, 347      | 631           | 10.33 μs (4.91 %), 51.23 μs (95.09 %)   | 49.22 μs  | 1.0  |         |
|                        | CHCl <sub>3</sub> | 392sh (1.16), 362sh (1.57), 343sh (1.68), 307sh (2.50), 293sh (2.64), 255sh (3.69)                 | 391, 329, 300, 270 | 661           | 4.59 ns (91.41 %), 34.38 ns (8.59 %)    | 7.15 ns   | 0.2  |         |
|                        | MeCN              | 372 (1.68), 340sh (2.00), 325sh (2.17), 304sh (2.44), 278(3.23), 250(4.06), 229 (4.95), 222 (5.42) | 336, 284, 240      | 510           | 4.63 ns                                 | 4.63 ns   | 0.3  |         |
|                        |                   |                                                                                                    | 384, 333, 300      | 661           | 3.26ns (87.34%), 18.43ns (12.66%)       | 5.18 ns   |      |         |

**Table S7.** The absorption and emission properties of compounds **14–29** (class C).

| <div> <p><b>CLASS C</b></p> <p><b>X = Cl or Br</b></p> </div> |                   |                                                                                                                         |                        |                       |                                       |                    |                       |           |
|---------------------------------------------------------------|-------------------|-------------------------------------------------------------------------------------------------------------------------|------------------------|-----------------------|---------------------------------------|--------------------|-----------------------|-----------|
| Compound                                                      | medium            | $\lambda_{\text{abs}}/\text{nm}$<br>( $10^4 \text{ } \epsilon/\text{dm}^3 \cdot \text{mol}^{-1} \cdot \text{cm}^{-1}$ ) | $\lambda_{\text{exc}}$ | $\lambda_{\text{PL}}$ | $\tau$                                | $\tau_{\text{av}}$ | $\Phi_{\text{PL}}/\%$ | Reference |
| <b>14<sup>Cl</sup></b>                                        | CHCl <sub>3</sub> | 408 (3.46), 367 (4.26), 314 (7.15), 261 (7.77)                                                                          | 395                    | 656                   | 5.70 ns                               | 5.70 ns            | 0.66                  | [36]      |
|                                                               | MeCN              | 384 (2.22), 352 (2.11), 301 (3.14), 253 (2.86), 222 (3.78)                                                              | 390                    | 646                   | 5.11 ns                               | 5.11 ns            | 0.37                  |           |
|                                                               | solid             | –                                                                                                                       | 442                    | 543, 567              | 5.95 μs (75.04%), 29.54 μs (24.96%)   | 11.84 μs           | 1.46                  |           |
|                                                               | 77K (EtOH/MeOH)   | –                                                                                                                       | 265, 312, 397          | 539, 576              | 120.89 μs (70.42%), 30.89 μs (29.58%) | 94.26 μs           | –                     |           |
| <b>15<sup>Cl</sup></b>                                        | CHCl <sub>3</sub> | 403 (2.47), 334 (9.60), 302 (8.85), 261 (7.62)                                                                          | 395                    | 675                   | 5.27 ns (91.57%), 24.75 ns (8.43%)    | 6.9 ns             | 0.20                  |           |
|                                                               | MeCN              | 384 (0.78), 315 (4.53), 279 (5.76), 244 (6.09)                                                                          | 380                    | 663                   | 2.81 ns (53.56%), 5.55 ns (46.44%)    | 4.1 ns             | 0.20                  |           |



|                  |                                 |                                                                      |  |                      |                           |                                                                            |                      |       |      |
|------------------|---------------------------------|----------------------------------------------------------------------|--|----------------------|---------------------------|----------------------------------------------------------------------------|----------------------|-------|------|
|                  | solid                           | –                                                                    |  | 435                  | 610                       | 665.76 ns (86.26%), 200.00 ns (13.74%)                                     | 601.76 ns            | 7.15  |      |
|                  | 77K (EtOH/MeOH)                 | –                                                                    |  | 307, 335, 369        | 528, 568                  | 84.96 μs (76.54%), 19.25 μs (23.46%)                                       | 69.54 μs             | –     |      |
| 16 <sup>Cl</sup> | CHCl <sub>3</sub>               | 407 (2.38), 333 (9.13), 292 (9.71), 260 (8.57)                       |  | 395                  | 675                       | 4.58 ns (83.98%), 27.23 ns (16.02%)                                        | 8.0 ns               | 0.22  |      |
|                  | MeCN                            | 381 (0.44), 321 (1.32), 258 (1.27), 194 (1.49)                       |  | 380                  | 664                       | 3.39 ns (73.34%), 11.57 ns (26.66%)                                        | 5.6 ns               | 0.22  |      |
|                  | solid                           | –                                                                    |  | 458                  | 604                       | 430.59 ns                                                                  | 430.6 ns             | 3.50  |      |
|                  | 77K (EtOH/MeOH)                 | –                                                                    |  | 307, 338, 369        | 525, 565                  | 87.31 μs (72.29%), 21.78 μs (27.71%)                                       | 69.15 μs             | –     |      |
| 17 <sup>Cl</sup> | CHCl <sub>3</sub>               | 428 (7.49), 327 (5.76), 260 (6.97)                                   |  | 390                  | 484                       | 2.40 ns                                                                    | 2.40 ns              | 0.15  |      |
|                  | MeCN                            | 406 (1.98), 314 (1.49), 257 (1.63), 220 (2.37)                       |  | 371                  | 516                       | 3.14 ns                                                                    | 3.14 ns              | 0.09  |      |
|                  | solid                           | –                                                                    |  | 500                  | 689<br>758                | 30.10 μs (71.97%), 9.81 μs (28.03%)<br>26.68 μs (73.34%), 7.45 μs (24.66%) | 24.41 μs<br>21.40 μs | 1.19  |      |
|                  | 77K (EtOH/MeOH)                 | –                                                                    |  | 301, 374<br>423, 447 | 410, 434, 467<br>661, 729 | 1.32 ns (68.55%), 0.32 ns (31.45%)<br>177.96 μs                            | 1.00 ns<br>177.96 μs | –     |      |
| 18 <sup>Cl</sup> | CHCl <sub>3</sub>               | 416 (2.58), 347 (6.38), 323 (6.94), 273 (6.43), 261 (6.58)           |  | 400                  | 684                       | 3.38 ns (73.23%), 6.49 ns (26.77%)                                         | 4.2 ns               | 0.73  |      |
|                  | MeCN                            | 383 (2.2), 340 (2.68), 304 (3.26), 253 (2.74), 222 (3.87), 198 (8.0) |  | 400                  | 643                       | 6.26 ns (90.66%), 1.00 ns (9.34%)                                          | 5.8 ns               | 0.52  |      |
|                  | solid                           | –                                                                    |  | 465                  | 633                       | 1.11 μs (79.42%), 20.74 μs (20.58%)                                        | 5.15 μs              | 7.99  |      |
|                  | 77K (EtOH/MeOH)                 | –                                                                    |  | 260, 312, 341, 388   | 540, 583                  | 158.48 μs (77.49%), 40.66 μs (22.51%)                                      | 131.96 μs            | –     |      |
| 19 <sup>Cl</sup> | CHCl <sub>3</sub>               | 408 (2.58), 358 (4.62), 316 (6.11), 257 (1.20)                       |  | 390                  | 666                       | 8.87 ns (88.55%), 40.64 ns (11.45%)                                        | 12.5 ns              | 0.58  |      |
|                  | MeCN                            | 387 (0.90), 341 (1.20), 305 (1.52), 255 (1.25), 222 (1.88)           |  | 386                  | 639                       | 9.29 ns (85.99%), 2.67 ns (14.01%)                                         | 8.4 ns               | 0.32  |      |
|                  | solid                           | –                                                                    |  | 461                  | 635                       | 2.00 μs (51.14%), 32.69 μs (48.86%)                                        | 17.00 μs             | 19.47 |      |
|                  | 77K (EtOH/MeOH)                 | –                                                                    |  | 313, 337, 386        | 540, 583                  | 162.91 μs (70.55%), 52.40 μs (29.45%)                                      | 130.36 μs            | –     |      |
| 20 <sup>Cl</sup> | CHCl <sub>3</sub>               | 404 (0.21), 318 (0.87), 287 (1.22), 263 (1.28)                       |  | 401                  | 682                       | 1.50 ns (60.69%), 2.76 ns (39.31%)                                         | 2.00 ns              | 0.22  |      |
|                  | MeCN                            | 382 (0.31), 325 (0.91), 282 (1.66), 255 (1.77)                       |  | 385                  | 678                       | 2.10 ns                                                                    | 2.10 ns              | 0.35  |      |
|                  | solid                           | –                                                                    |  | 480                  | 612                       | 59.95 ns                                                                   | 59.95 ns             | 2.74  |      |
|                  | 77K (EtOH/MeOH)                 | –                                                                    |  | 370                  | 555                       | 4.86 μs                                                                    | 4.86 μs              | –     |      |
| 21 <sup>Cl</sup> | CHCl <sub>3</sub>               | 405 (0.35), 307 (1.60), 276 (2.20), 261 (2.50)                       |  | 402                  | 677                       | 2.22 ns (68.28%), 26.96 ns (31.72%)                                        | 10.07 ns             | 0.21  | [37] |
|                  | MeCN                            | 382 (0.50), 310 (1.89), 273 (2.83), 256 (3.23)                       |  | 380                  | 673                       | 1.87 ns (68.93%), 15.16 ns (31.07%)                                        | 6.00 ns              | 0.31  |      |
|                  | solid                           | –                                                                    |  | 493                  | 636                       | 61.15 ns                                                                   | 61.15 ns             | 1.76  |      |
|                  | 77K (EtOH/MeOH)                 | –                                                                    |  | 367                  | 553                       | 3.13 μs (64.24%), 9.84 μs (35.76%)                                         | 5.53 μs              | –     |      |
| 22 <sup>Cl</sup> | CHCl <sub>3</sub>               | 406 (0.40), 312 (1.62), 259 (3.27)                                   |  | 404                  | 692                       | 2.39 ns (52.32%), 0.98 ns (47.68%)                                         | 1.72 ns              | 0.13  | [29] |
|                  | MeCN                            | 388 (0.44), 312 (1.52), 256 (3.65)                                   |  | 380                  | 693                       | 1.85 ns                                                                    | 1.85 ns              | 0.31  |      |
|                  | solid                           | –                                                                    |  | 461                  | 603                       | 52.12 ns                                                                   | 52.12 ns             | 2.91  |      |
|                  | 77K (EtOH/MeOH)                 | –                                                                    |  | 365                  | 567                       | 4.10 μs (71.03%), 1.08 μs (28.97%)                                         | 3.22 μs              | –     |      |
| 22 <sup>Br</sup> | MeCN                            | 388, 322, 265, 251                                                   |  | 340                  | 682                       | 2.3 ns (85%), 21 ns (15%)                                                  | 5.10 ns              | 0.01  |      |
| 23 <sup>Cl</sup> | CHCl <sub>3</sub>               | 404 (0.6), 321 (2.8), 266 (3.7)                                      |  | 389                  | 668                       | 1.41 ns (62.30%); 6.92 ns (37.60%)                                         | 3.5 ns               | 0.98  | [38] |
|                  | MeCN                            | 385 (0.6), 318 (2.7), 266 (4.2)                                      |  | 390                  | 663                       | 2.35 ns (94.4%); 8.34 ns (5.54%)                                           | 2.7 ns               | <0.01 |      |
|                  | solid                           | –                                                                    |  | 430                  | 598                       | 2.62 ns (5.03%); 249.02 ns (94.97%)                                        | 236.6 ns             | 7.74  |      |
|                  | 77K (EtOH/MeOH)                 | –                                                                    |  | 380                  | 585, 548, 508             | 41.23 μs (29.84%); 148.54 μs (70.16%)                                      | 116.52 μs            | –     |      |
| 24 <sup>Cl</sup> | CHCl <sub>3</sub>               | 397 (2.2), 304 (3.7), 292 (4.0)                                      |  | 398                  | 652                       | 6.27 ns                                                                    | 6.27 ns              | 0.49  | [39] |
|                  | MeCN                            | 391 (2.5), 302 (3.9), 286 (4.2), 230 (5.7)                           |  | 376                  | 631                       | 0.43 ns (15.26%); 3.96 ns (84.74%)                                         | 3.4 ns               | 0.73  |      |
|                  | solid                           | –                                                                    |  | 462                  | 588                       | 64.74 ns (6.94%); 286.66 ns (93.06%)                                       | 271.3 ns             | 14.12 |      |
|                  | 77K (EtOH/MeOH)                 | –                                                                    |  | 415                  | 518, 551                  | 12.77 μs (38.19%); 51.85 μs (61.81%)                                       | 36.93 μs             | –     |      |
| 25 <sup>Cl</sup> | CH <sub>2</sub> Cl <sub>2</sub> | 224 (62.3), 277 (25.9), 397 (9.3)                                    |  | 459                  | 578                       | 1.37 μs                                                                    | 1.37 μs              | 0.3   | [39] |
|                  | solid                           | –                                                                    |  | 365                  | 551                       | 1.66 μs                                                                    | 1.66 μs              | –     |      |
| 26 <sup>Cl</sup> | CH <sub>2</sub> Cl <sub>2</sub> | 219 (31.4), 282 (25.3), 380 (8.0)                                    |  | 444                  | 600                       | 2.50 μs                                                                    | 2.50 μs              | 0.6   |      |
|                  | solid                           | –                                                                    |  | 367                  | 554                       | 1.97 μs                                                                    | 1.97 μs              | –     |      |
| 27 <sup>Cl</sup> | CH <sub>2</sub> Cl <sub>2</sub> | 220 (36.6), 256 (29.4), 383 (8.6)                                    |  | 454                  | 593                       | 1.44 μs                                                                    | 1.44 μs              | 1.3   |      |
|                  | solid                           | –                                                                    |  | 367                  | 532                       | 1.87 μs                                                                    | 1.87 μs              | –     |      |
| 28 <sup>Cl</sup> | CH <sub>2</sub> Cl <sub>2</sub> | 220 (45.5), 279 (26.8), 378 (6.9)                                    |  | 442                  | 601                       | 1.33 μs                                                                    | 1.33 μs              | 0.9   |      |

|                        |                                 |                                   |     |     |         |         |   |  |
|------------------------|---------------------------------|-----------------------------------|-----|-----|---------|---------|---|--|
|                        | solid                           | –                                 | 365 | 546 | 3.04 μs | 3.04 μs | – |  |
| <b><sup>29</sup>Cl</b> | CH <sub>2</sub> Cl <sub>2</sub> | 219 (34.6), 255 (20.9), 384 (5.2) | 450 | –   | 1.53 μs | 1.53 μs | – |  |
|                        | solid                           | –                                 | 365 | 551 | 2.94 μs | 2.94 μs | – |  |

**Table S8.** The absorption and emission properties of compounds **30–45** (class D).

| 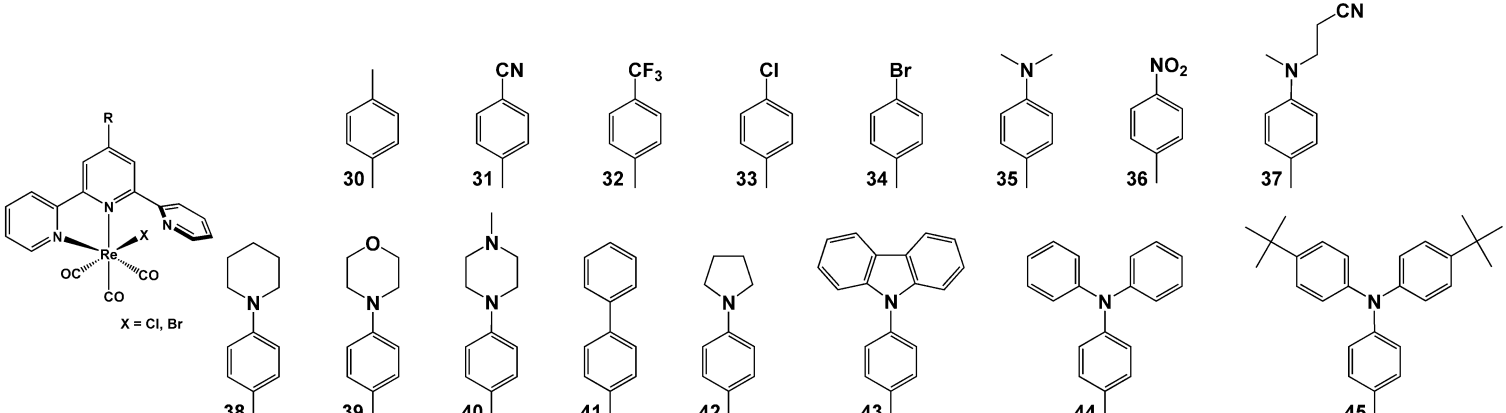 |                   |                                                                                                                |                        |                       |                                                |                    |                       |           |
|------------------------------------------------------------------------------------|-------------------|----------------------------------------------------------------------------------------------------------------|------------------------|-----------------------|------------------------------------------------|--------------------|-----------------------|-----------|
| Compound                                                                           | medium            | $\lambda_{\text{abs}}/\text{nm}$<br>( $10^4 \epsilon/\text{dm}^3 \cdot \text{mol}^{-1} \cdot \text{cm}^{-1}$ ) | $\lambda_{\text{exc}}$ | $\lambda_{\text{PL}}$ | $\tau$                                         | $\tau_{\text{av}}$ | $\phi_{\text{PL}}/\%$ | Reference |
| <b>30<sup>Br</sup></b>                                                             | MeCN              | 268 (2.86), 301 (2.93), 379 (0.49)                                                                             | —                      | —                     | —                                              | —                  | —                     | [30]      |
|                                                                                    | DMF               | 307 (2.39), 382 (0.43)                                                                                         | —                      | —                     | —                                              | —                  | —                     |           |
| <b>31<sup>Cl</sup></b>                                                             | DMF               | 389                                                                                                            | —                      | 667                   | 0.58 ns                                        | 0.58 ns            | —                     | [27]      |
|                                                                                    | DMF (77K)         | —                                                                                                              | —                      | 585                   | —                                              | —                  | —                     |           |
| <b>32<sup>Cl</sup></b>                                                             | DMF               | 387                                                                                                            | —                      | 666                   | 0.79 ns                                        | 0.79 ns            | —                     | [27]      |
|                                                                                    | DMF (77K)         | —                                                                                                              | —                      | 578                   | —                                              | —                  | —                     |           |
| <b>33<sup>Cl</sup></b>                                                             | CHCl <sub>3</sub> | 398.6 (4.0), 303.0 (25.1), 267.6 (23.4)                                                                        | 397                    | 669                   | 3.03 ns (91.19%), 17.99 ns (8.81%)             | 4.35 ns            | 0.13                  | [35]      |
|                                                                                    | MeCN              | 385.4 (3.3), 284.9 (19.6), 264.0 (18.2), 196.6 (178.2)                                                         | 376                    | 664                   | 2.12 (86.66%), 5.61 (13.34%)                   | 2.56 ns            | 0.09                  |           |
|                                                                                    | solid             | —                                                                                                              | 475                    | 591                   | 493.10 ns                                      | 493.10 ns          | 21.00                 |           |
|                                                                                    | 77K (EtOH/MeOH)   | —                                                                                                              | 264, 305, 335, 365     | 542                   | 5.52 $\mu$ s (66.83%), 1.90 $\mu$ s (33.17%)   | 4.32 $\mu$ s       | —                     |           |
| <b>34<sup>Cl</sup></b>                                                             | DMF               | 382                                                                                                            | —                      | 663                   | 1.35 ns                                        | 1.35 ns            | —                     | [27]      |
|                                                                                    | DMF (77K)         | —                                                                                                              | —                      | 575                   | —                                              | —                  | —                     |           |
| <b>34<sup>Cl</sup></b>                                                             | CHCl <sub>3</sub> | 401.2 (4.8), 304.2 (30.2), 267.9 (27.1)                                                                        | 396                    | 665                   | 2.94 (63.71%), 71.60 (36.29%)                  | 27.86 ns           | 0.44                  | [35]      |
|                                                                                    | MeCN              | 385.4 (5.4), 294.5 (32.5), 264.7 (30.8), 194.5 (71.8)                                                          | 376                    | 664                   | 2.21 (87.33%), 12.91 (12.67%)                  | 3.57 ns            | 0.15                  |           |
|                                                                                    | solid             | —                                                                                                              | 479                    | 592                   | 425.34 ns                                      | 425.34 ns          | 16.93                 |           |
|                                                                                    | 77K (EtOH/MeOH)   | —                                                                                                              | 267, 304, 333, 365     | 551                   | 5.11 $\mu$ s (75.16%), 1.80 $\mu$ s (24.84%)   | 4.29 $\mu$ s       | —                     |           |
| <b>35<sup>Cl</sup></b>                                                             | DMF               | 425                                                                                                            | —                      | 532                   | 380.00 ns                                      | 380.00 ns          | —                     | [27]      |
|                                                                                    | DMF (77K)         | —                                                                                                              | —                      | 560                   | —                                              | —                  | —                     |           |
|                                                                                    | CHCl <sub>3</sub> | 429.8 (14.4), 380.2 (8.2) sh, 312.6 (14.7), 247.2 (17.1)                                                       | 421                    | 636                   | 22.54 (84.36%), 7.11 (15.64%)                  | 20.13 ns           | 1.13                  | [35]      |
|                                                                                    | MeCN              | 419.2 (16.5), 354.1 (9.3), 308.7 (14.2), 246.2 (17.7), 192.2 (178.2)                                           | 452                    | 687                   | 0.18 (96.30%), 2.48 (3.70%)                    | 0.26 ns            | 1.91                  |           |
|                                                                                    | solid             | —                                                                                                              | 494                    | 636                   | 0.28 $\mu$ s (61.85%), 3.08 $\mu$ s (38.15%)   | 1.35 $\mu$ s       | 0.67                  |           |
|                                                                                    | 77K (EtOH/MeOH)   | —                                                                                                              | 312, 325, 368, 444     | 580                   | 263.3 $\mu$ s (77.92%), 103.4 $\mu$ s (22.08%) | 228.0 $\mu$ s      | —                     |           |
|                                                                                    | CHCl <sub>3</sub> | 430 (1.44)                                                                                                     | 425                    | 637                   | 17.4 ns (94.4%), 63.9 ns (5.6%)                | 20.00 ns           | 1.3                   | [25]      |
|                                                                                    | THF               | 415 (2.69)                                                                                                     | 415                    | 650                   | 23.1 ns (42.54%), 64.08 ns (57.46%)            | 46.64 ns           | 4.5                   |           |

|                  |                                 |                                          |               |             |                                                                          |                     |            |         |
|------------------|---------------------------------|------------------------------------------|---------------|-------------|--------------------------------------------------------------------------|---------------------|------------|---------|
|                  | MeCN                            | 419 (1.65)                               | 456           | 687         | 2.65ns (10.03%), 197.12 ns (89.97%)                                      | 177.60 ns           | 2.0        | [40]    |
|                  | DMF                             | 425 (2.34)                               | 425           | 680         | 27.44 ns (1.28%), 1696.08 ns (98.72%)                                    | 1.67 $\mu$ s        | <0.1       |         |
|                  | solid                           | –                                        | 494           | 636         | 0.3 $\mu$ s (61.8%), 3.1 $\mu$ s (38.2%)                                 | 1.37 $\mu$ s        | 0.7        |         |
|                  | 77K (EtOH/MeOH)                 | –                                        | 444           | 580         | 263.0 $\mu$ s (77.9%), 103.0 $\mu$ s (22.1%)                             | 227.64 $\mu$ s      | –          |         |
|                  | CHCl <sub>3</sub>               | 430 (1.44)                               | 425           | 637         | 17.4 ns (94.4%), 63.9 ns (5.6%)                                          | 30.55 ns            | 1.3        |         |
|                  | MeCN                            | 419 (1.65)                               | 456           | 687         | 4.50 ns                                                                  | 4.50 ns             | 2.0        |         |
|                  | solid                           | –                                        | 494           | 636         | 0.3 $\mu$ s (61.8%), 3.1 $\mu$ s (38.2%)                                 | 1.37 $\mu$ s        | 0.7        |         |
|                  | 77K (EtOH/MeOH)                 | –                                        | 444           | 580         | 263 $\mu$ s (77.9%), 103 $\mu$ s (22.1%)                                 | 227.64 $\mu$ s      | –          |         |
| 35 <sup>Cl</sup> | H <sub>2</sub> O                | 426                                      | 405           | 612         | 9.72 ns                                                                  | 9.72 ns             | 0.052      | [41]    |
|                  | CH <sub>2</sub> Cl <sub>2</sub> | 426                                      | 405           | 541         | 26.27 ns                                                                 | 26.27 ns            | 0.266      |         |
| 36 <sup>Cl</sup> | H <sub>2</sub> O                | –                                        | 405           | –           | 5.67 ns                                                                  | 5.67 ns             | 0.5        |         |
|                  | CH <sub>2</sub> Cl <sub>2</sub> | 389                                      | 405           | –           | 6.44ns                                                                   | 6.44ns              | 0.2        |         |
| 37 <sup>Cl</sup> | CHCl <sub>3</sub>               | 405 (1.72)                               | 430           | 643         | 7.36 ns (98.0%), 30.49 ns (1.96 %)                                       | 7.81ns              | 2.6        | [25]    |
|                  | THF                             | 406 (1.78)                               | 445           | 665         | 5.40 ns (97.52%), 29.01 ns (2.48%)                                       | 5.99 ns             | 2.7        |         |
|                  | MeCN                            | 405 (2.24)                               | 415           | 640         | 11.27 (18.65%), 100.42 (76.38%)                                          | 78.80 ns            | 0.3        |         |
|                  | DMF                             | 417 (2.26)                               | 420           | 640         | 100.69 ns (19.67%), 696.39 ns (80.33%)                                   | 579.22 ns           | 0.3        |         |
|                  | solid                           | –                                        | 450           | 560,589,649 | 326.31 ns (39.61%), 1157.5 ns (60.39%)                                   | 828.26 ns           | 0.3        |         |
|                  | 77K (EtOH/MeOH)                 | –                                        | 410           | 564         | 75.46 $\mu$ s (28.46%), 211.49 $\mu$ s (71.54%)                          | 172.78 $\mu$ s      | –          |         |
| 38 <sup>Cl</sup> | CHCl <sub>3</sub>               | 418 (1.87)                               | 358<br>417    | 510<br>634  | 4.10 ns<br>5.2 ns (37.7%), 23.5 ns (62.3%)                               | 4.10 ns<br>16.60 ns | 1.0<br>0.8 | [40]    |
|                  | MeCN                            | 404 (1.21)                               | 445           | 698         | 4.7 ns (52.7%), 43.4 ns (47.3%)                                          | 23.00 ns            | 0.8        |         |
|                  | solid                           | –                                        | 536           | 653         | 13.5 ns (39.6%), 165.7 ns (60.4%)                                        | 105.43 ns           | 0.4        |         |
|                  | 77K (EtOH/MeOH)                 | –                                        | 435           | 585         | 4.4 $\mu$ s (2.9%), 93 $\mu$ s (22.1%), 277 $\mu$ s (75%)                | 228.43 $\mu$ s      | –          |         |
|                  |                                 |                                          |               |             |                                                                          |                     |            |         |
| 39 <sup>Cl</sup> | CHCl <sub>3</sub>               | 403 (1.57)                               | 404           | 650         | 6.2 ns (96.1%), 88.8 ns (3.9%)                                           | 40.59 ns            | 0.6        |         |
|                  | MeCN                            | 398 (2.19)                               | 420           | 661         | 5.9 ns (47.9%), 67.1 ns (52.0%)                                          | 37.72 ns            | 1.0        |         |
|                  | solid                           | –                                        | 470           | 571         | 1.4 $\mu$ s (22.6%), 6.5 $\mu$ s (77.4%)                                 | 5.35 $\mu$ s        | 8.7        |         |
|                  | 77K (EtOH/MeOH)                 | –                                        | 419           | 570         | 71.6 $\mu$ s (27.4%), 235 $\mu$ s (72.6%)                                | 190.23 $\mu$ s      | –          |         |
| 40 <sup>Cl</sup> | CHCl <sub>3</sub>               | 405 (1.63)                               | 405           | 645         | 8.10 ns                                                                  | 8.10ns              | 0.9        | [25]    |
|                  | THF                             | 405 (1.75)                               | 405           | 665         | 4.72 ns (43.81%) 7.12 ns (56.19)                                         | 6.07 ns             | 1.0        |         |
|                  | MeCN                            | 402 (1.93)                               | 405           | 665         | 9.00 ns (15.06%), 170.42 ns (84.94%)                                     | 146.11 ns           | <0.1       |         |
|                  | DMF                             | 409 (1.66)                               | 409           | 650         | 9.51 ns (7.08%), 266.39 ns (92.92%)                                      | 248.20 ns           | 0.1        |         |
|                  | solid                           | –                                        | 475           | 613         | 346.71 ns (47.39%), 738.59 ns (52.61%)                                   | 552.88 ns           | 7.1        |         |
|                  | 77K (EtOH/MeOH)                 | –                                        | 420           | 560         | 80.75 $\mu$ s (32.16%), 223.81 $\mu$ s (67.84%)                          | 177.80 $\mu$ s      | –          |         |
| 41 <sup>Cl</sup> | CHCl <sub>3</sub>               | –                                        | 392           | 664         | 3.67 ns (93.89%), 32.77 ns (6.11%)                                       | 5.45 ns             | 0.52       | [35]    |
|                  | MeCN                            | –                                        | 366           | 442<br>671  | 4.46 ns (52.20%), 1.57 ns (47.80%)<br>2.94 ns (60.41%), 1.75 ns (39.59%) | 3.08 ns<br>2.47 ns  | 0.47       |         |
|                  | solid                           | –                                        | 462           | 592         | 494.42 ns                                                                | 494.42 ns           | 12.46      |         |
|                  | 77K (EtOH/MeOH)                 | –                                        | 263, 306, 363 | 516, 550    | 88.51 $\mu$ s (66.94%), 12.86 $\mu$ s (33.06%)                           | 63.50 $\mu$ s       | –          |         |
| 42 <sup>Cl</sup> | CHCl <sub>3</sub>               | 420.9 (2.42), 306.9 (2.83), 246.9 (3.38) | 289, 329, 404 | 507         | 3.74 ns                                                                  | 3.74 ns             | 0.14       | [26,42] |

|                        |                   |                                                            |                         |               |                                                                          |                    |       |      |
|------------------------|-------------------|------------------------------------------------------------|-------------------------|---------------|--------------------------------------------------------------------------|--------------------|-------|------|
|                        |                   |                                                            | 265, 303, 369, 432      | 617           | 3.04 ns (20.60%) 49.78 ns (79.40%)                                       | 40.15 ns           |       |      |
|                        | MeCN              | 414.1 (2.51), 308.2 (2.40), 247.7 (3.05), 191.1 (8.68)     | 257, 315, 365, 458      | 702           | 0.079 ns                                                                 | 0.079 ns           | 0.36  |      |
|                        | solid             | –                                                          | 302, 351, 522           | 625           | 0.70 $\mu$ s (44.36%), 3.54 $\mu$ s (55.65%)                             | 2.28 $\mu$ s       | 1.29  |      |
|                        | EtOH-MeOH (77K)   | –                                                          | 319, 429                | 588           | 93.46 $\mu$ s (20.55%), 279.07 $\mu$ s (79.45%)                          | 240.93 $\mu$ s     | –     |      |
| <b>43<sup>Cl</sup></b> | CHCl <sub>3</sub> | 391 (1.51), 332 (1.67), 310 (2.73), 287 (3.87), 245 (6.46) | 385, 316, 287, 261      | 506<br>657    | 7.74 ns (76.77%), 2.90 ns (23.23%)<br>3.17 ns (73.15%), 7.66 ns (26.85%) | 4.00 ns<br>4.38 ns | 1.39  | [42] |
|                        | MeCN              | 380 (1.52), 338 (1.63), 309 (2.34), 288 (3.63), 237 (6.67) | 370, 326, 282, 254      | 651           | 0.58 ns (13.33%), 2.60 ns (86.67%)                                       | 2.33 ns            | 0.58  |      |
|                        | solid             | –                                                          | 486                     | 596           | 332.71 ns                                                                | 332.71 ns          | 15.42 |      |
|                        | 77K (EtOH/MeOH)   | –                                                          | 400, 322, 289, 278, 240 | 513, 540      | 9.87 $\mu$ s (41.66%), 38.36 $\mu$ s (58.34%)                            | 26.49 $\mu$ s      | –     |      |
| <b>44<sup>Cl</sup></b> | CHCl <sub>3</sub> | 438 (1.57)                                                 | 447                     | 628           | 9.1 ns (53.3%), 252.2 ns (46.7%)                                         | 122.63 ns          | 0.8   | [40] |
|                        | MeCN              | 420 (1.94)                                                 | 456                     | 695           | 14.6 ns                                                                  | 14.6 ns            | 0.4   |      |
|                        | solid             | –                                                          | 515                     | 604           | 0.90 $\mu$ s (30.6%), 3.90 $\mu$ s (69.4%)                               | 2.98 $\mu$ s       | 1.3   |      |
|                        | 77K (EtOH/MeOH)   | –                                                          | 453                     | 569, 601sh    | 111 $\mu$ s (31.9%), 301 $\mu$ s (68.1%)                                 | 240.39 $\mu$ s     | –     |      |
| <b>45<sup>Cl</sup></b> | CHCl <sub>3</sub> | 449 (2.05), 371 (0.94), 326 (1.48), 300 (2.50)             | 452, 373, 301, 266      | 613           | 87.2 ns (43.0%), 19.3 ns (31.3%), 5.1 ns (25.7%)                         | 44.85 ns           | 1.26  | [8]  |
|                        | MeCN              | 429 (3.18), 359 (1.33), 319 (2.59), 295 (3.36)             | 437, 323, 296           | 743           | 151.6 ns (97.1%), 9.1 ns (2.9%)                                          | 147.47 ns          | 8.92  |      |
|                        | solid             | –                                                          | 447                     | 586           | 9.0 $\mu$ s (24.6%), 2.6 $\mu$ s (75.4%)                                 | 4.17 $\mu$ s       | 10.08 |      |
|                        | 77K (EtOH/MeOH)   | –                                                          | 465, 372, 328, 296, 260 | 581, 626 (sh) | 323.3 $\mu$ s (88.0%), 79.0 $\mu$ s (12.0%)                              | 293.98 $\mu$ s     | –     |      |

**Table S9.** The absorption and emission properties of [ReX(CO)<sub>2</sub>(R-terpy- $\kappa^3$ N)] (X = Cl, Br) (class E).

| 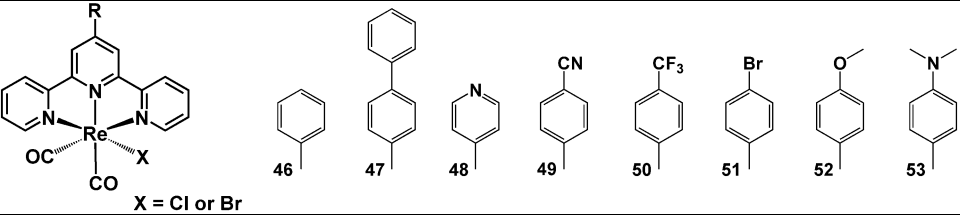<br>X = Cl or Br |        |                                                                                                                         |                        |                       |        |                    |                       |           |
|-----------------------------------------------------------------------------------------------------|--------|-------------------------------------------------------------------------------------------------------------------------|------------------------|-----------------------|--------|--------------------|-----------------------|-----------|
| Compound                                                                                            | medium | $\lambda_{\text{abs}}/\text{nm}$<br>( $10^4 \text{ } \epsilon/\text{dm}^3 \cdot \text{mol}^{-1} \cdot \text{cm}^{-1}$ ) | $\lambda_{\text{exc}}$ | $\lambda_{\text{PL}}$ | $\tau$ | $\tau_{\text{av}}$ | $\Phi_{\text{PL}}/\%$ | Reference |
| <b>46<sup>Cl</sup></b>                                                                              | DMF    | 721, 575, 479, 407                                                                                                      |                        |                       |        |                    |                       | [28]      |
| <b>46<sup>Br</sup></b>                                                                              | MeCN   | 700 (0.12), 569sh (0.13), 473 (0.60), 398 (0.46), 334 (2.25, sh), 323 (2.48), 286 (4.14), 239 (2.38, sh)                | –                      | ND                    | ND     | ND                 | ND                    | [29]      |
| <b>47<sup>Br</sup></b>                                                                              | MeCN   | 705 (0.14), 475 (0.88), 401 (0.58), 328 (4.66), 287 (3.76), 234 (3.24)                                                  | –                      | ND                    | ND     | ND                 | ND                    |           |
| <b>48<sup>Br</sup></b>                                                                              | MeCN   | 721 (0.06), 481 (0.35), 402 (0.28), 328 (1.35), 283 (2.39), 227 (2.46, sh)                                              | –                      | ND                    | ND     | ND                 | ND                    | [43]      |
|                                                                                                     | MeCN   | ~ 720, 490 (0.30), 410 (0.15), 335 (2.00), 280 (3.50),                                                                  | –                      | ND                    | ND     | ND                 | ND                    |           |
| <b>49<sup>Cl</sup></b>                                                                              | DMF    | ~ 760 (0.25), 485 (0.75), 415 (0.65), 340 (2.75)                                                                        | –                      | ND                    | ND     | ND                 | ND                    | [28]      |
| <b>50<sup>Cl</sup></b>                                                                              | DMF    | ~ 760 (0.25), 485 (0.70), 410 (0.65), 340 (2.60)                                                                        | –                      | ND                    | ND     | ND                 | ND                    |           |
| <b>51<sup>Cl</sup></b>                                                                              | DMF    | ~ 760 (0.25), 485 (0.70), 410 (0.65), 320 (2.80)                                                                        | –                      | ND                    | ND     | ND                 | ND                    |           |
| <b>52<sup>Cl</sup></b>                                                                              | DMF    | ~ 740 (0.25), 480 (0.70), 400 (0.65), 330 (3.50)                                                                        | –                      | ND                    | ND     | ND                 | ND                    |           |
| <b>53<sup>Cl</sup></b>                                                                              | DMF    | ~ 710 (0.25), 490 (1.75), 410 (1.75), 310 (3.50)                                                                        | –                      | ND                    | ND     | ND                 | ND                    |           |

**Table S10.** The absorption and emission properties of  $[\text{Re}(\text{X/L})(\text{CO})_3(\text{R-terpy-}\kappa^2\text{N})]^{0/+}$  and  $[\text{Re}(\text{X/L})(\text{CO})_2(\text{R-terpy-}\kappa^3\text{N})]^{0/+}$  bearing the ancillary ligands different from halide ions (class F).

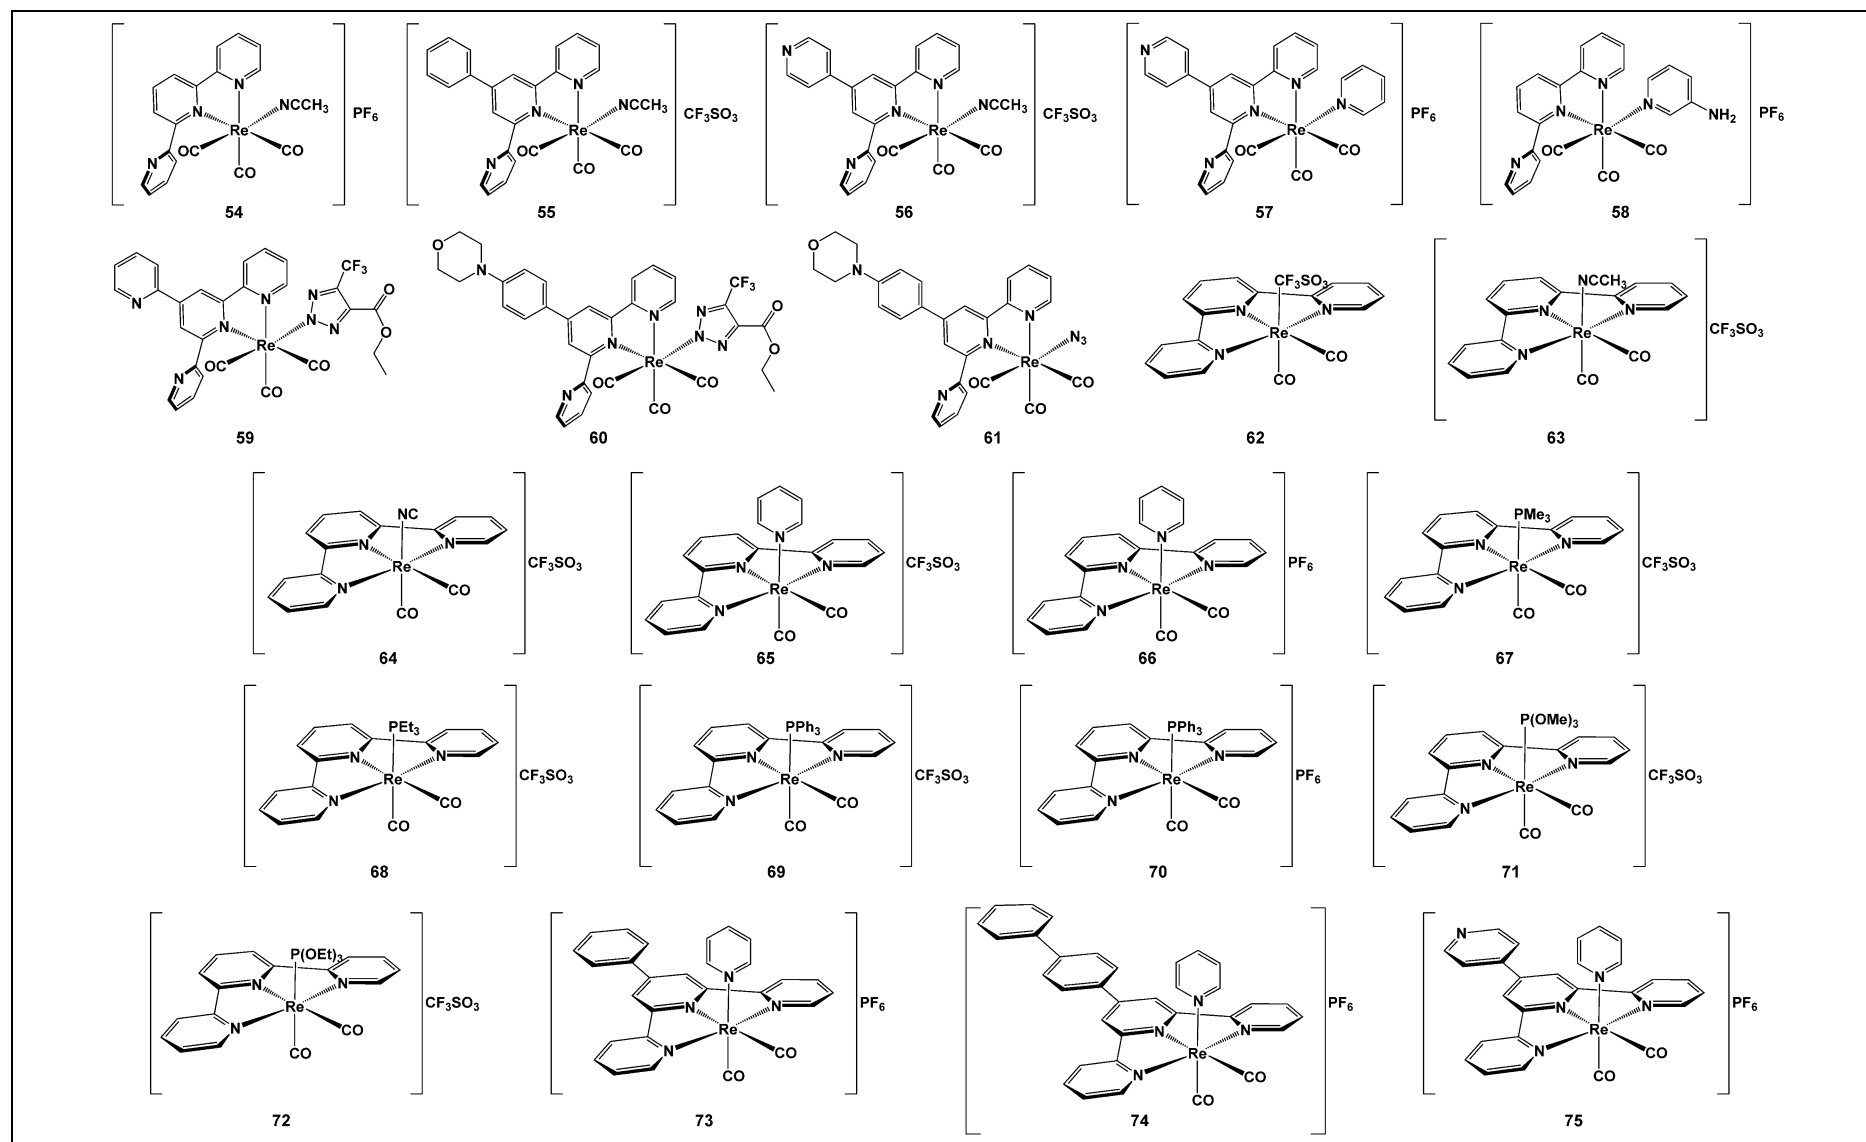

| Compound | medium                            | $\lambda_{\text{abs}}/\text{nm}$<br>( $10^4 \text{ } \epsilon/\text{dm}^3 \cdot \text{mol}^{-1} \cdot \text{cm}^{-1}$ ) | $\lambda_{\text{exc}}$ | $\lambda_{\text{PL}}$      | $\tau$ | $\tau_{\text{av}}$ | $\phi_{\text{PL}}/\%$ | Reference |
|----------|-----------------------------------|-------------------------------------------------------------------------------------------------------------------------|------------------------|----------------------------|--------|--------------------|-----------------------|-----------|
| 54       | MeCN                              |                                                                                                                         | 360                    | 510                        | –      | –                  | –                     | [44]      |
| 55       | MeCN                              | 328 (1.73), 277 (2.67) 251 (2.62)                                                                                       | –                      | –                          | –      | –                  | –                     | [45]      |
| 56       | MeCN                              | 330 (1.27), 279 (sh), 253 (2.81)                                                                                        | –                      | –                          | –      | –                  | –                     |           |
| 57       | MeCN                              | 381 (0.40 ), 330 (1.31), 278 (2.59), 254 (3.42)                                                                         |                        | 564                        | 3.5 ns |                    |                       | [46]      |
| 58       | MeCN                              | –                                                                                                                       | –                      | –                          | –      | –                  | –                     | [44]      |
| 59       | DMF<br>MeOH<br>1,4-dioxane        | ~ 380, 340, 280                                                                                                         |                        |                            |        |                    |                       | [47]      |
| 60       | DMSO<br>DMF<br>1,4-dioxane<br>Tol | 370                                                                                                                     |                        |                            |        |                    |                       | [48]      |
| 61       | DMSO<br>DMF<br>1,4-dioxane<br>Tol | 413, 314<br>409<br>389<br>393                                                                                           |                        |                            |        |                    |                       |           |
| 62       | MeCN                              | 651 (0.17), 436 (0.64), 378 (0.55), 320 (4.71), 281 (2.38), 272 (2.45), 232 (3.95)                                      | ND                     | ND                         | ND     | ND                 | ND                    | [49]      |
| 63       | MeCN                              | 652 (0.16), 427 (0.54), 375 (0.46), 318 (4.16), 280 (2.39), 273 (2.05), 231 (3.81)                                      | ND                     | ND                         | ND     | ND                 | ND                    |           |
|          | MeCN                              | 425 (0.03), 374 (0.03), 319 (0.25), 280 (0.18), 272 (0.16), 192 (0.67)                                                  | ND                     | ND                         | ND     | ND                 | ND                    | [50]      |
| 64       | MeCN                              | 661 (0.14), 445 (0.36), 385 (0.43), 317 (2.90), 281 (1.73), 273 (1.80), 221 (3.12)                                      | ND                     | ND                         | ND     | ND                 | ND                    | [49]      |
| 65       | MeCN                              | 676 (0.052), 450 (0.10), 377 (0.12), 322 (0.67), 281 (0.53), 255 (0.96), 250 (0.96), 233 (1.01)                         | ND                     | ND                         | ND     | ND                 | ND                    |           |
|          | MeCN                              | 610 (0.029), 444 (0.069), 383 (0.86), 321 (0.61), 281 (0.41), 251                                                       | ND                     | ND                         | ND     | ND                 | ND                    | [50]      |
| 66       | MeCN                              | 647 (0.15), 516 (0.17), 440 (0.48), 380 (0.60), 322(3.73), 281 (2.27), 274 (1.96, sh), 227 (2.95, sh)                   | 440                    | 870                        | ND     | ND                 | 0.13                  | [29]      |
| 67       | MeCN                              | 646 (0.11), 432 (0.45), 375 (0.38), 318 (3.42), 281 (1.60), 272 (1.54), 226 (2.83)                                      | ND                     | ND                         | ND     | ND                 | ND                    | [49]      |
| 68       | MeCN                              | 651 (0.17), 436 (0.64), 378 (0.55), 320 (4.71), 281 (2.38), 272 (2.45), 232 (3.95)                                      | ND                     | ND                         | ND     | ND                 | ND                    |           |
|          | MeCN                              | 618 (0.011), 435 (0.031), 377, 320 (0.17), 281 (0.16), 272 (0.16)                                                       | ND                     | ND                         | ND     | ND                 | ND                    | [50]      |
| 69       | MeCN                              | 625 (br), 421 (0.27), 371 (0.23), 319 (1.99), 273 (1.78), 228 (3.75)                                                    | ND                     | ND                         | ND     | ND                 | ND                    | [49]      |
|          | MeCN                              | 610 (0.03), 435 (0.09), 377 (0.09), 322 (0.74), 255 (3.13)                                                              | ND                     | ND                         | ND     | ND                 | ND                    | [50]      |
|          | MeCN                              | 590 (0.11), 488 (0.14), 421 (0.38), 374 (0.32), 320 (2.77), 273 (2.10)                                                  | ND                     | ND                         | ND     | ND                 | ND                    | [29]      |
| 70       | MeCN                              | 590 (0.11), 488 (0.14), 421 (0.38), 374 (0.32), 320 (2.77), 273 (2.10)                                                  | 440                    | 800                        | 10.2ns | 10.2ns             | 0.76                  |           |
| 71       | MeCN                              | 600 (0.10), 408 (0.44), 367 (0.37), 312 (3.48), 279 (1.98), 272 (1.87), 230 (3.39)                                      | ND                     | ND                         | ND     | ND                 | ND                    | [49]      |
| 72       | MeCN                              | 575 (0.130, 530 (0.15), 481 (0.16), 411 (0.47), 368 (0.38), 314 (3.89), 5280 (1.98), 272 (1.87), 230 (3.39)             | 350                    | 402 – 448<br>(77 K –125 K) | –      | –                  | –                     |           |
| 73       | MeCN                              | 661 (0.12), 529 (0.14, sh), 448 (0.70), 382 (0.61), 323 (3.18), 285 (3.84), 240 (2.19)                                  | 440                    | 876                        | ND     | ND                 | 0.13                  | [29]      |
| 74       | MeCN                              | 661 (0.13), 544 (0.14, sh), 449 (1.00), 386 (0.85sh), 325 (4.64), 285 (4.32). 235 (3.07)                                | 440                    | 865                        | ND     | ND                 | 0.11                  |           |
| 75       | MeCN                              | 678 (0.14), 539 (0.16, sh), 454 (0.82), 385 (0.72), 326 (3.38), 284 (4.45), 277(3.80, sh), 263 (2.89), 242 (2.90)       | 440                    | 950                        | ND     | ND                 | 0.02                  |           |
|          | MeCN                              | 713 (0.08), 487 (0.54), 387 (0.44), 326 (2.47), 285 (3.27), 280 (2.78), 252 (1.92), 237 (1.85)                          | ND                     | ND                         | ND     | ND                 | ND                    | [46]      |

**Table S11.** Electrochemical data of  $[\text{Re}(\text{X/L})(\text{CO})_3(\text{R-terpy-}\kappa^2\text{N})]^{0/+}$  and  $[\text{Re}(\text{X/L})(\text{CO})_2(\text{R-terpy-}\kappa^3\text{N})]^{0/+}$ .

| Compound                                                    | medium                   | $E_{\text{red, peak}}$ [V]<br>( $\Delta E$ [mV])                                                                                                                                       | $E_{\text{ox, peak}}$ [V]<br>( $\Delta E$ [mV])                                                                                          | $E_{\text{red, onset}}$ [V]                 | $E_{\text{ox, onset}}$ [V]                          | $\text{IP}^{\text{a}}$ [eV] | $\text{EA}^{\text{b}}$ [eV] | $E_{\text{g}}^{\text{c}}$ [eV] | Reference |
|-------------------------------------------------------------|--------------------------|----------------------------------------------------------------------------------------------------------------------------------------------------------------------------------------|------------------------------------------------------------------------------------------------------------------------------------------|---------------------------------------------|-----------------------------------------------------|-----------------------------|-----------------------------|--------------------------------|-----------|
| $[\text{ReCl}(\text{CO})_3(\text{terpy-}\kappa^2\text{N})]$ | $\text{CH}_2\text{Cl}_2$ |                                                                                                                                                                                        |                                                                                                                                          | -1.71, -2.15<br>(-1.79, -2.10) <sup>d</sup> | 0.60, 0.85, 1.03<br>(0.57, 0.74, 0.87) <sup>d</sup> | -5.71                       | -3.39                       | 2.31                           | [8]       |
|                                                             | MeCN                     | -1.71                                                                                                                                                                                  | 0.79                                                                                                                                     |                                             |                                                     |                             |                             |                                | [44]      |
|                                                             | MeCN                     | -1.40                                                                                                                                                                                  | 1.19                                                                                                                                     |                                             |                                                     |                             |                             |                                | [51]      |
| $[\text{ReBr}(\text{CO})_3(\text{terpy-}\kappa^2\text{N})]$ | DMF                      | -1.30 (77)                                                                                                                                                                             | 1.31 (irr)                                                                                                                               |                                             |                                                     |                             |                             |                                | [29]      |
|                                                             | MeCN                     | -1.75 <sup>e</sup> , -2.13 <sup>f</sup>                                                                                                                                                | ~ 2.15, ~ 0.4                                                                                                                            |                                             |                                                     |                             |                             |                                | [30]      |
|                                                             | MeCN                     | -1.73, -2.04                                                                                                                                                                           | 0.78, 0.91, 1.07                                                                                                                         | -1.61                                       | 0.68                                                | -5.78                       | -3.49                       | 2.29                           | [26]      |
| $1^{\text{Cl}}$                                             | DMF                      | -1.73                                                                                                                                                                                  | The oxidation was outside of the electrochemical window of experiment ( $E_{\text{ox}}^{\text{o}} > 0.5 \text{ V vs Fc}^+/ \text{Fc}$ ). | –                                           | –                                                   | –                           | –                           | –                              | [27]      |
| $1^{\text{Br}}$                                             | DMF                      | -1.25 (63), -1.74 (irr)                                                                                                                                                                | 1.23 (irr)                                                                                                                               | –                                           | –                                                   | –                           | –                           | –                              | [29]      |
|                                                             | MeCN                     | -1.70 <sup>e</sup><br><sup>a</sup> Mid-point potential for the 1st quasi-reversible reduction<br>-2.04 <sup>f</sup><br><sup>b</sup> Peak potential for the irreversible 2nd reduction. | ~ 2.15, ~ 0.4                                                                                                                            | –                                           | –                                                   | –                           | –                           | –                              | [30]      |
| $2^{\text{Cl}}$                                             | $\text{CH}_2\text{Cl}_2$ | –                                                                                                                                                                                      | –,                                                                                                                                       | -1.67, -2.04<br>(-1.69, -2.01) <sup>d</sup> | 0.73, 0.95<br>(0.71, 0.98) <sup>d</sup>             | -5.83                       | -3.43                       | 2.40                           | [31]      |
| $3^{\text{Cl}}$                                             | $\text{CH}_2\text{Cl}_2$ | –                                                                                                                                                                                      | –                                                                                                                                        | -1.63, -1.96<br>(-1.64, -1.96) <sup>d</sup> | 0.67, 0.86, 1.02<br>(0.65, 0.84, 1.02) <sup>d</sup> | -5.77                       | -3.47                       | 2.30                           |           |
| $4^{\text{Cl}}$                                             | $\text{CH}_2\text{Cl}_2$ | –                                                                                                                                                                                      | –                                                                                                                                        | -1.67, -2.03<br>(-1.65, -2.00) <sup>d</sup> | 0.66, 1.03<br>(0.64, 1.02) <sup>d</sup>             | -5.76                       | -3.43                       | 2.33                           |           |
| $5^{\text{Cl}}$                                             | $\text{CH}_2\text{Cl}_2$ | –                                                                                                                                                                                      | –                                                                                                                                        | -1.76                                       | 0.67                                                | -5.77                       | -3.34                       | 2.43                           | [32]      |
| $6^{\text{Cl}}$                                             | $\text{CH}_2\text{Cl}_2$ | –                                                                                                                                                                                      | –                                                                                                                                        | -1.69                                       | 0.61                                                | -5.71                       | -3.41                       | 2.30                           |           |
| $7^{\text{Cl}}$                                             | $\text{CH}_2\text{Cl}_2$ | –                                                                                                                                                                                      | –                                                                                                                                        | -1.65, -1.97<br>(-1.65, -1.94) <sup>d</sup> | 0.71, 0.97<br>(0.71, 0.96) <sup>d</sup>             | -5.81                       | -3.45                       | 2.36                           | [31]      |
| $8^{\text{Cl}}$                                             | DMF                      | -1.77                                                                                                                                                                                  | The oxidation was outside of the electrochemical window of experiment ( $E_{\text{ox}}^{\text{o}} > 0.5 \text{ V vs Fc}^+/ \text{Fc}$ ). | –                                           | –                                                   | –                           | –                           | –                              | [27]      |
|                                                             | MeCN                     | -1.66, -2.13, -2.40                                                                                                                                                                    | 0.86 1.15                                                                                                                                | -1.51                                       | 0.77                                                | -5.87                       | -3.59                       | 2.28                           | [33]      |
| $9^{\text{Cl}}$                                             | $\text{CH}_2\text{Cl}_2$ | -1.80                                                                                                                                                                                  | 0.71                                                                                                                                     | -1.70                                       | 0.62                                                | -5.72                       | -3.40                       | 2.32                           | [34]      |



|                                                     |                                 |                                         |                               |                                                 |                                             |                  |                  |                |      |
|-----------------------------------------------------|---------------------------------|-----------------------------------------|-------------------------------|-------------------------------------------------|---------------------------------------------|------------------|------------------|----------------|------|
| <b>10<sup>Cl</sup></b>                              | CH <sub>2</sub> Cl <sub>2</sub> | −1.99                                   | 0.58                          | −1.88                                           | 0.50                                        | −5.60            | −3.22            | 2.38           |      |
| <b>11<sup>Cl</sup></b>                              | MeCN                            | −1.64, −2.10, −2.37                     | 0.93, 1.18, 1.35              | −1.51                                           | 0.79                                        | −5.89            | −3.59            | 2.30           | [33] |
| <b>12<sup>Cl</sup></b>                              | CH <sub>2</sub> Cl <sub>2</sub> | −1.82                                   | 0.82                          | −1.71                                           | 0.69                                        | −5.79            | −3.39            | 2.40           | [34] |
| <b>13<sup>Cl</sup></b>                              | MeCN                            | −1.67, −2.10, −2.23                     | 0.86, 1.13, 1.31              | −1.52                                           | 0.78                                        | −5.88            | −3.58            | 2.30           | [33] |
| <b>14<sup>Cl</sup></b>                              | MeCN                            | −1.46, −1.77                            | 0.77, 1.22                    | −1.20                                           | 0.64                                        | −5.74            | −3.90            | 1.84           | [36] |
| <b>15<sup>Cl</sup></b>                              | MeCN                            | −1.28, −1.71                            | 0.80                          | −1.15                                           | 0.69                                        | −5.79            | −3.95            | 1.84           |      |
| <b>16<sup>Cl</sup></b>                              | MeCN                            | −1.35                                   | 0.72, 1.07                    | −1.21                                           | 0.60                                        | −5.70            | −3.89            | 1.81           |      |
| <b>17<sup>Cl</sup></b>                              | MeCN                            | −1.37, −1.70                            | 0.71, 1.06                    | −1.24                                           | 0.58                                        | −5.68            | −3.86            | 1.82           |      |
| <b>18<sup>Cl</sup></b>                              | MeCN                            | −1.34, −1.66                            | 1.05                          | −1.20                                           | 0.80                                        | −5.90            | −3.90            | 2.00           |      |
| <b>19<sup>Cl</sup></b>                              | MeCN                            | −1.37, −1.73                            | 0.78, 1.13                    | −1.18                                           | 0.62                                        | −5.72            | −3.92            | 1.80           |      |
| <b>20<sup>Cl</sup></b>                              | MeCN                            | −1.38, −1.66                            | 1.14                          | −1.18                                           | 0.95                                        | −6.05            | −3.92            | 2.13           | [37] |
| <b>21<sup>Cl</sup></b>                              | MeCN                            | −1.55, −1.84                            | 0.93                          | −1.40                                           | 0.83                                        | −5.93            | −3.70            | 2.23           |      |
| <b>22<sup>Cl</sup></b>                              | MeCN                            | −1.56, −1.83                            | 0.94                          | −1.41                                           | 0.78                                        | −5.88            | −3.69            | 2.19           |      |
| <b>22<sup>Br</sup></b>                              | DMF                             | −0.99 (79)                              | 1.45 (irr)                    |                                                 |                                             |                  |                  |                | [29] |
| <b>23<sup>Cl</sup></b>                              | MeCN                            | −1.78 (qr)<br>(−1.76) <sup>d</sup>      | 0.75<br>(0.54)                | −1.65<br>(−1.59)                                | 0.57<br>(0.40)                              | −5.67<br>(−5.50) | −3.45<br>(−3.51) | 2.22<br>(1.99) | [38] |
| <b>24<sup>Cl</sup></b>                              | MeCN                            | −1.85<br>(−1.91)                        | 0.75<br>(0.68)                | −1.73<br>(−1.83)                                | 0.65<br>(0.58)                              | −5.75<br>(−5.68) | −3.37<br>(−3.27) | 2.38<br>(2.41) |      |
| <b>25<sup>Cl</sup></b>                              | CH <sub>2</sub> Cl <sub>2</sub> | −                                       | −                             | −                                               | −                                           | −                | −                | 2.77           | [39] |
| <b>26<sup>Cl</sup></b>                              | CH <sub>2</sub> Cl <sub>2</sub> | −                                       | −                             | −                                               | −                                           | −                | −                | 2.85           |      |
| <b>27<sup>Cl</sup></b>                              | CH <sub>2</sub> Cl <sub>2</sub> | −                                       | −                             | −                                               | −                                           | −                | −                | 2.83           |      |
| <b>28<sup>Cl</sup></b>                              | CH <sub>2</sub> Cl <sub>2</sub> | −                                       | −                             | −                                               | −                                           | −                | −                | 2.96           |      |
| <b>29<sup>Cl</sup></b>                              | CH <sub>2</sub> Cl <sub>2</sub> | −                                       | −                             | −                                               | −                                           | −                | −                | 2.89           |      |
| <b>30<sup>Br</sup></b>                              | MeCN                            | −1.70 <sup>e</sup> , −2.04 <sup>f</sup> | ~ 2.15, ~ 0.4                 |                                                 |                                             |                  |                  |                | [30] |
| <b>31<sup>Cl</sup></b>                              | DMF                             | −1.61                                   |                               |                                                 |                                             |                  |                  |                | [27] |
| <b>32<sup>Cl</sup></b>                              | DMF                             | −1.66                                   |                               |                                                 |                                             |                  |                  |                |      |
| <b>33<sup>Cl</sup></b>                              | DMF                             | −1.70                                   |                               |                                                 |                                             |                  |                  |                |      |
|                                                     | MeCN                            | −1.75, −2.23                            | 0.75, 1.12                    | −1.63                                           | 0.59                                        | −5.69            | −3.47            | 2.22           |      |
| <b>34<sup>Br</sup></b>                              | MeCN                            | −1.69 <sup>e</sup> , −2.03 <sup>f</sup> | ~ 2.15, ~ 0.4                 |                                                 |                                             |                  |                  |                | [30] |
| <b>34<sup>Cl</sup></b>                              | DMF                             | −1.70                                   |                               |                                                 |                                             |                  |                  |                | [27] |
|                                                     | MeCN                            | −1.70                                   | 0.77, 1.31                    | −1.50                                           | 0.66                                        | −5.76            | −3.60            | 2.16           | [35] |
| <b>35<sup>Cl</sup></b>                              | DMF                             | −1.81                                   |                               |                                                 |                                             |                  |                  |                | [27] |
|                                                     | MeCN                            | −1.76 <sup>d</sup>                      | 0.54 <sup>d</sup>             | −1.68                                           | 0.48                                        | −5.58            | −3.42            | 2.16           | [40] |
| <b>38<sup>Cl</sup></b>                              | MeCN                            | −1.74 <sup>d</sup>                      | 0.52, 0.63, 0.99 <sup>d</sup> | −1.61                                           | 0.42                                        | −5.52            | −3.49            | 2.03           |      |
| <b>39<sup>Cl</sup></b>                              | MeCN                            | −1.75                                   | 0.64, 0.87 <sup>d</sup>       | −1.65                                           | 0.57                                        | −5.67            | −3.45            | 2.22           |      |
| <b>41<sup>Br</sup></b>                              | DMF                             | −1.25 (60), −1.70 (irr)                 | 1.19 (irr)                    |                                                 |                                             |                  |                  |                | [29] |
| <b>41<sup>Cl</sup></b>                              | MeCN                            | −1.76                                   | 0.76                          | −1.63                                           | 0.60                                        | −5.70            | −3.47            | 2.23           | [35] |
| <b>42<sup>Cl</sup></b>                              | MeCN                            | −1.84, −2.07, −2.23                     | 0.58, 0.81                    | −1.67                                           | 0.46                                        | −5.56            | −3.43            | 2.13           | [26] |
| <b>43<sup>Cl</sup></b>                              | MeCN                            | −1.78, −2.04                            | 0.71 .0.86                    | −1.65                                           | 0.59                                        | −5.69            | −3.45            | 2.24           | [42] |
| <b>44<sup>Cl</sup></b>                              | MeCN                            | −1.72                                   | 0.66                          | −1.66                                           | 0.57                                        | −5.67            | −3.44            | 2.23           | [40] |
| <b>45<sup>Cl</sup></b>                              | MeCN                            |                                         |                               | −1.70(qr), −2.03<br>(−1.74, −2.08) <sup>d</sup> | 0.47(qr), 0.74<br>(0.40, 0.68) <sup>d</sup> | −5.57            | −3.40            | 2.17           | [8]  |
| <b>[ReCl(CO)<sub>2</sub>(terpy-κ<sup>3</sup>N)]</b> | MeCN                            | −1.17 (iir), −1.34 (irr)                | 0.48 (65), 1.22 (irr)         |                                                 |                                             |                  |                  |                | [49] |
| <b>[ReBr(CO)<sub>2</sub>(terpy-κ<sup>3</sup>N)]</b> | DMF                             | −1.31 (qr)                              | 0.55 (52)                     |                                                 |                                             |                  |                  |                | [29] |
| <b>46<sup>Br</sup></b>                              | DMF                             | −1.27 (qr)                              | 0.55 (63)                     |                                                 |                                             |                  |                  |                |      |
| <b>46<sup>Cl</sup></b>                              | DMF                             | −1.65                                   | 0.05                          |                                                 |                                             |                  |                  |                | [28] |
| <b>47<sup>Br</sup></b>                              | DMF                             | −1.26 (irr)                             | 0.50 (76), 1.26 (irr)         |                                                 |                                             |                  |                  |                | [29] |

|                        |      |                                                                    |                        |  |  |  |  |  |      |
|------------------------|------|--------------------------------------------------------------------|------------------------|--|--|--|--|--|------|
| <b>48<sup>Br</sup></b> | DMF  | −0.89 (95)*, −1.23 (irr)<br>*affected by the addition of ferrocene | 0.56 (48)              |  |  |  |  |  |      |
| <b>49<sup>Cl</sup></b> | DMF  | −1.58                                                              | 0.09                   |  |  |  |  |  | [28] |
| <b>50<sup>Cl</sup></b> | DMF  | −1.60                                                              | 0.07                   |  |  |  |  |  |      |
| <b>51<sup>Cl</sup></b> | DMF  | −1.62                                                              | 0.06                   |  |  |  |  |  |      |
| <b>52<sup>Cl</sup></b> | DMF  | −1.67                                                              | 0.05                   |  |  |  |  |  |      |
| <b>53<sup>Cl</sup></b> | DMF  | −1.71                                                              | 0.03                   |  |  |  |  |  |      |
| <b>54</b>              | MeCN | −1.60, −1.80(irr)                                                  |                        |  |  |  |  |  | [44] |
| <b>55</b>              | MeCN | −1.15, −1.36 (irr), −1.55 (irr)                                    | 1.41 (irr)             |  |  |  |  |  | [45] |
| <b>56</b>              | MeCN | −1.11, −1.28 (irr), −1.60 (irr)                                    | 1.41 (irr)             |  |  |  |  |  |      |
| <b>57</b>              | DMF  | −0.92, −1.43 (qr)                                                  | 1.50 (irr)             |  |  |  |  |  | [46] |
| <b>58</b>              | MeCN | −1.54                                                              | 1.13 (irr)             |  |  |  |  |  | [44] |
| <b>62</b>              | MeCN | −1.19 (irr), −1.35(irr)                                            | 0.84 (irr)             |  |  |  |  |  | [49] |
| <b>63</b>              | MeCN | −1.21 (irr)                                                        | 0.80 (irr), 1.59 (irr) |  |  |  |  |  |      |
| <b>64</b>              | MeCN | −0.90 (irr), −2.12 (irr)                                           | 0.67 (irr), 1.25 (irr) |  |  |  |  |  |      |
| <b>65</b>              | MeCN | −1.21 (irr)                                                        | 0.86 (irr), 1.35 (irr) |  |  |  |  |  |      |
| <b>66</b>              | DMF  | −1.14 (qr), −1.38 (irr)                                            | 0.82 (91)              |  |  |  |  |  | [29] |
| <b>67</b>              | MeCN | −1.21, −1.64 (irr)                                                 | 0.84                   |  |  |  |  |  | [49] |
| <b>68</b>              | MeCN | −1.21, −1.64 (irr)                                                 | 0.84                   |  |  |  |  |  |      |
| <b>69</b>              | MeCN | −1.19 (irr)                                                        | 0.94 (irr), 1.31 (irr) |  |  |  |  |  |      |
| <b>70</b>              | DMF  | −1.11 (80)                                                         | 0.95 (89)              |  |  |  |  |  | [29] |
| <b>71</b>              | MeCN | −1.24, −1.50 (irr)                                                 | 0.92, 1.30 (irr)       |  |  |  |  |  | [49] |
| <b>72</b>              | MeCN | −1.23, −1.5 (irr)                                                  | 0.92, 1.30 (irr)       |  |  |  |  |  |      |
| <b>73</b>              | DMF  | −1.11 (qr), −1.35 (irr)                                            | 0.82 (63)              |  |  |  |  |  | [29] |
| <b>74</b>              | DMF  | −1.11 (qr), −1.29 (irr)                                            | 0.81 (69)              |  |  |  |  |  |      |
| <b>75</b>              | DMF  | −0.96 (qr), −1.27                                                  | 0.83 (77)              |  |  |  |  |  |      |
|                        | DMF  | −0.94 (qr), −1.25 (qr), −1.77 (qr)                                 | 0.86 (qr)              |  |  |  |  |  | [46] |

<sup>a</sup> IP = −5.1-E<sub>ox (onset)</sub>, <sup>b</sup> EA = −5.1-E<sub>red (onset)</sub>, <sup>c</sup> Eg = E<sub>ox (onset)</sub> − E<sub>red (onset)</sub>, <sup>d</sup>determined by DPV measurments, <sup>e</sup>Mid-point potential for the 1st quasi-reversible reduction, <sup>f</sup>Peak potential for the irreversible 2nd reduction.

**Table S12.** The absorption and emission properties of higher nuclearity coordination compounds with photoactive  $\{\text{Re}(\text{CO})_3(\text{R-terpy-}\kappa^2\text{N})\}$  and  $\{\text{Re}(\text{CO})_2(\text{R-terpy-}\kappa^3\text{N})\}$  subunits.

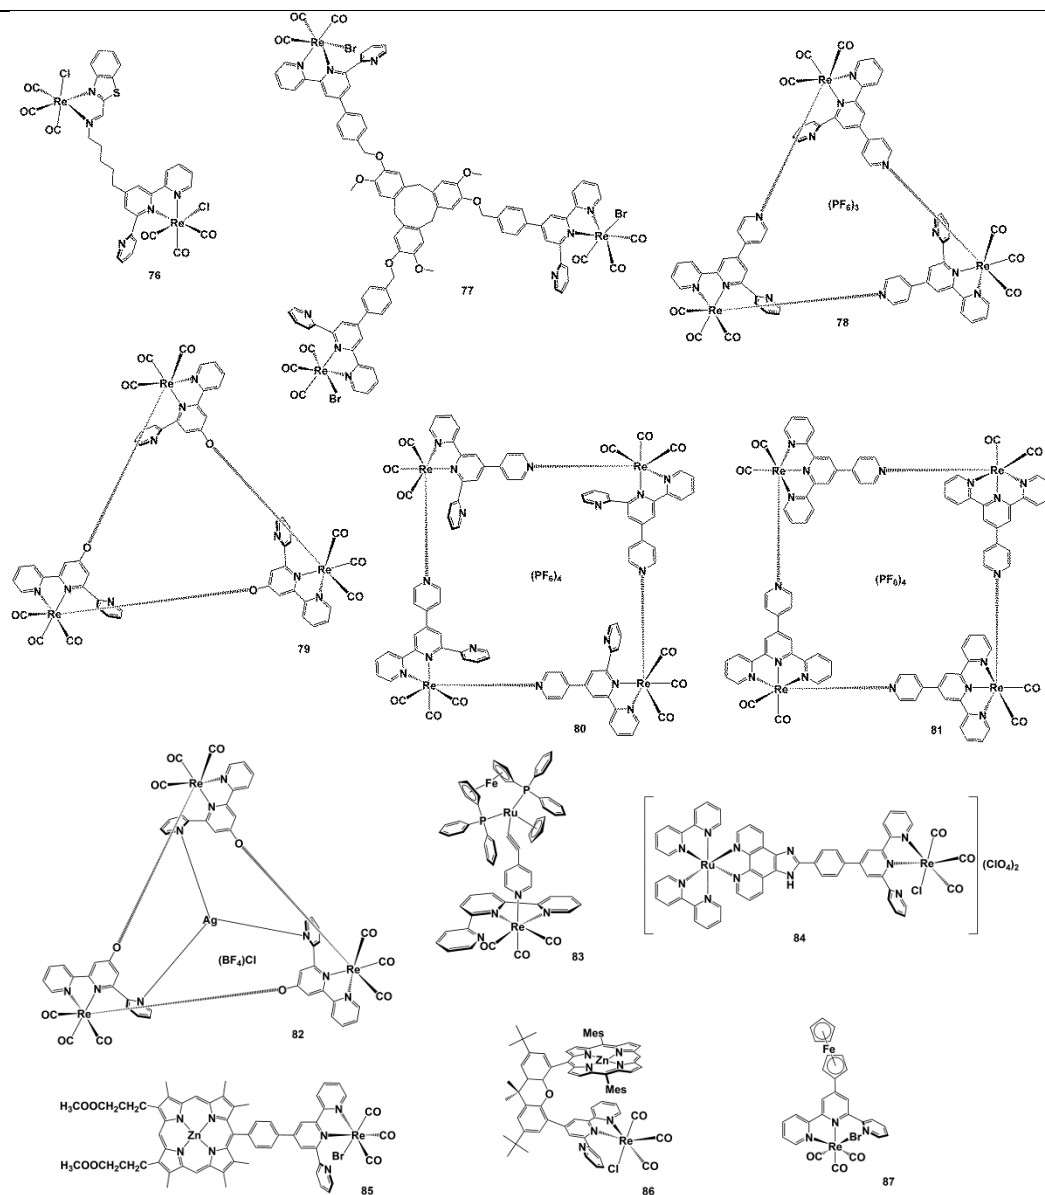

| Compound | medium                          | $\lambda_{\text{abs}}/\text{nm}$<br>( $10^4 \epsilon/\text{dm}^3 \cdot \text{mol}^{-1} \cdot \text{cm}^{-1}$ ) | $\lambda_{\text{exc}}$ | $\lambda_{\text{PL}}$ | $\tau$                                          | $\tau_{\text{av}}$ | $\phi_{\text{PL}}/\%$ | Reference |
|----------|---------------------------------|----------------------------------------------------------------------------------------------------------------|------------------------|-----------------------|-------------------------------------------------|--------------------|-----------------------|-----------|
| 76       | MeOH                            | 250 (5.0549), 317 (2.9895), 336 (2.1075), 428 (0.7257)                                                         | -                      | -                     | -                                               | -                  | -                     | [52]      |
|          | CH <sub>3</sub> CN              | -                                                                                                              | 428                    | 650                   | -                                               | -                  | -                     |           |
| 77       | DMSO                            | 280, 310, 330, 360                                                                                             | 350–450                | 460–510               | 0.9 ns (21.5%), 3.4 ns (48.5%), 11.0 ns (30.0%) | 5.10 ns            | -                     | [53]      |
| 78       | CH <sub>3</sub> CN              | 252 (6.53), 278 (4.42), 331 (3.04), 381 (1.59)                                                                 | -                      | 546                   | 3.6 ns                                          | 3.60 ns            | -                     | [46]      |
| 79       | CH <sub>3</sub> CN              | 352 (1.49)                                                                                                     | 365                    | 557                   | 22 ns                                           | 22 ns              | 0.19                  |           |
| 80       | CH <sub>3</sub> CN              | 252 (9.96), 278 (6.79), 334 (4.85), 381 (2.53)                                                                 | -                      | 563                   | 3.4 ns                                          | 3.40 ns            | -                     |           |
| 81       | CH <sub>3</sub> CN              | 237 (7.03), 252 (6.82), 280 (8.10), 285 (9.06), 327 (7.37), 387 (1.83), 466 (2.57), 712 (0.17)                 | -                      | 980                   | ND                                              | ND                 | -                     |           |
| 82       | CH <sub>3</sub> CN              | 348 (1.33)                                                                                                     | 361                    | 566                   | 20 ns                                           | 20 ns              | 0.15                  | [54]      |
| 83       | CH <sub>2</sub> Cl <sub>2</sub> | 407 (2.3)                                                                                                      | -                      | -                     | -                                               | -                  | -                     | [55]      |
| 84       | CH <sub>3</sub> CN              | 285 (12.5), 337 (5.07), 423 (2.76), 455 (2.86)                                                                 | 460                    | 608                   | 21.3 ns (46%), 133.8 ns (54%)                   | 82.00 ns           | 2.23                  | [56]      |
| 85       | -                               | -                                                                                                              | -                      | -                     | -                                               | -                  | -                     | [57]      |
| 86       | CH <sub>2</sub> Cl <sub>2</sub> | 305 (5.0), 418 (41.9), 544 (2.2)                                                                               | 372                    | 588, 638              | 2.23 ns                                         | 2.23 ns            | 2.20                  | [58]      |
| 87       | DMF                             | 311 (4.2), 370 (1.1), 516 (0.56)                                                                               | -                      | -                     | -                                               | -                  | -                     | [30]      |
|          | CH <sub>3</sub> CN              | 256 (2.3), 310 (2.2), 367 (0.50), 516 (0.24)                                                                   | -                      | -                     | -                                               | -                  | -                     |           |

## References:

1. Groom, C.R.; Bruno, I.J.; Lightfoot, M.P.; Ward, S.C. The Cambridge Structural Database. *Acta Crystallogr. Sect. B Struct. Sci. Cryst. Eng. Mater.* **2016**, *72*, 171–179, doi:10.1107/S2052520616003954.
2. Whang, D.R.; Apaydin, D.H.; Park, S.Y.; Sariciftci, N.S. An Electron-Reservoir Re(I) Complex for Enhanced Efficiency for Reduction of CO<sub>2</sub> to CO. *J. Catal.* **2018**, *363*, 191–196, doi:10.1016/j.jcat.2018.04.028.
3. Stange, A.F.; Tokura, S.; Kira, M. Ruthenium and Rhenium Complexes with Silyl-Substituted Bipyridyl Ligands. *J. Organomet. Chem.* **2000**, *612*, 117–124, doi:10.1016/S0022-328X(00)00429-0.
4. Costa, I.; Montalti, M.; Pallavicini, P.; Perotti, A.; Prodi, L.; Zaccheroni, N. Absorption and Luminescence as a Function of pH for Carboxylic Acid-Functionalized ReI Tricarbonyls. *J. Organomet. Chem.* **2000**, *593–594*, 267–273, doi:10.1016/S0022-328X(99)00541-0.
5. Obata, M.; Kitamura, A.; Mori, A.; Kameyama, C.; Czaplewska, J.A.; Tanaka, R.; Kinoshita, I.; Kusumoto, T.; Hashimoto, H.; Harada, M.; et al. Syntheses, Structural Characterization and Photophysical Properties of 4-(2-Pyridyl)-1,2,3-Triazole Rhenium(I) Complexes. *Dalton Trans.* **2008**, 3292–3300, doi:10.1039/B718538C.
6. Boulay, A.; Artigau, M.; Coulais, Y.; Picard, C.; Mestre-Voegtlé, B.; Benoist, E. First Dinuclear Re/Tc Complex as a Potential Bimodal Optical/SPECT Molecular Imaging Agent. *Dalton Trans.* **2011**, *40*, 6206–6209, doi:10.1039/C0DT01397H.
7. Ramos, L.D.; da Cruz, H.M.; Morelli Frin, K.P. Photophysical Properties of Rhenium(i) Complexes and Photosensitized Generation of Singlet Oxygen. *Photochem. Photobiol. Sci.* **2017**, *16*, 459–466, doi:10.1039/c6pp00364h.
8. Maroń, A.M.; Szlapa-Kula, A.; Matussek, M.; Kruszynski, R.; Siwy, M.; Janeczek, H.; Grzelak, J.; Maćkowski, S.; Schab-Balcerzak, E.; Machura, B. Photoluminescence Enhancement of Re(I) Carbonyl Complexes Bearing D–A and D– $\pi$ –A Ligands. *Dalton Trans.* **2020**, *49*, 4441–4453, doi:10.1039/C9DT04871E.
9. Cannizzo, A.; Blanco-Rodríguez, A.M.; El Nahhas, A.; Šebera, J.; Záliš, S.; Vlček, A.Jr.; Chergui, M. Femtosecond Fluorescence and Intersystem Crossing in Rhenium(I) Carbonyl–Bipyridine Complexes. *J. Am. Chem. Soc.* **2008**, *130*, 8967–8974, doi:10.1021/ja710763w.
10. Ertl, M.; Monkowius, U.; Oppelt, K.T. Unexpected Redox Chemistry of P $\cap$ N- and As $\cap$ N-Rhenium(I) Tricarbonyl Complexes in the Presence of CO<sub>2</sub> Acting as an Acid. *Inorg. Chem.* **2023**, *62*, 17510–17521, doi:10.1021/acs.inorgchem.3c02925.
11. Kalyanasundaram, K. Luminescence and Redox Reactions of the Metal-to-Ligand Charge-Transfer Excited State of Tricarbonylchloro-(Polypyridyl)Rhenium(I) Complexes. *J. Chem. Soc. Faraday Trans. 2 Mol. Chem. Phys.* **1986**, *82*, 2401–2415, doi:10.1039/F29868202401.
12. Kalyanasundaram, K.; Graetzel, M.; Nazeeruddin, M.K. Luminescence and Intramolecular Energy-Transfer Processes in Isomeric Cyano-Bridged Rhenium(I)-Rhenium(I) and Rhenium(I)-Ruthenium(II)-Rhenium(I) Polypyridyl Complexes. *Inorg. Chem.* **1992**, *31*, 5243–5253, doi:10.1021/ic00051a016.
13. McKiernan, J.; Pouxviel, J.C.; Dunn, B.; Zink, J.I. Rigidochromism as a Probe of Gelation and Densification of Silicon and Mixed Aluminum-Silicon Alkoxides. *J. Phys. Chem.* **1989**, *93*, 2129–2133, doi:10.1021/j100342a081.
14. Rossenaar, B.D.; Stufkens, D.J.; Vlček, A. Halide-Dependent Change of the Lowest-Excited-State Character from MLCT to XLCT for the Complexes Re(X)(CO)<sub>3</sub>( $\alpha$ -Diimine) (X = Cl, Br, I;  $\alpha$ -Diimine = Bpy, iPr-PyCa, iPr-DAB) Studied by Resonance

- Raman, Time-Resolved Absorption, and Emission Spectroscopy. *Inorg. Chem.* **1996**, *35*, 2902–2909, doi:10.1021/ic9509802.
15. Suntrup, L.; Stein, F.; Klein, J.; Wilting, A.; Parlane, F.G.L.; Brown, C.M.; Fiedler, J.; Berlinguette, C.P.; Siewert, I.; Sarkar, B. Rhenium Complexes of Pyridyl-Mesoionic Carbenes: Photochemical Properties and Electrocatalytic CO<sub>2</sub> Reduction. *Inorg. Chem.* **2020**, *59*, 4215–4227, doi:10.1021/acs.inorgchem.9b02591.
  16. Thomas, K.R.J.; Lin, J.T.; Lin, H.-M.; Chang, C.-P.; Chuen, C.-H. Ruthenium and Rhenium Complexes of Fluorene-Based Bipyridine Ligands: Synthesis, Spectra, and Electrochemistry. *Organometallics* **2001**, *20*, 557–563, doi:10.1021/om000764n.
  17. Werrett, M.V.; Chartrand, D.; Gale, J.D.; Hanan, G.S.; MacLellan, J.G.; Massi, M.; Muzzioli, S.; Raiteri, P.; Skelton, B.W.; Silberstein, M.; et al. Synthesis, Structural, and Photophysical Investigation of Diimine Triscarbonyl Re(I) Tetrazolato Complexes. *Inorg. Chem.* **2011**, *50*, 1229–1241, doi:10.1021/ic1015516.
  18. Kurz, P.; Probst, B.; Spingler, B.; Alberto, R. Ligand Variations in [ReX(Diimine)(CO)<sub>3</sub>] Complexes: Effects on Photocatalytic CO<sub>2</sub> Reduction. *Eur. J. Inorg. Chem.* **2006**, *2006*, 2966–2974, doi:10.1002/ejic.200600166.
  19. El Nahhas, A.; Cannizzo, A.; van Mourik, F.; Blanco-Rodríguez, A.M.; Zális, S.; Vlček, A.Jr.; Chergui, M. Ultrafast Excited-State Dynamics of [Re(L)(CO)<sub>3</sub>(Bpy)]<sup>n</sup> Complexes: Involvement of the Solvent. *J. Phys. Chem. A* **2010**, *114*, 6361–6369, doi:10.1021/jp101999m.
  20. Bhuvaneswari, J.; Mareeswaran, P.M.; Anandababu, K.; Rajagopal, S. The Switching of a Rhenium(I) Complex from Turn-off to Turn-on Sensor System through Protein Binding. *RSC Adv.* **2014**, *4*, 34659–34668, doi:10.1039/C4RA05464D.
  21. Blackburn, A.L.; Baker, N.C.A.; Fletcher, N.C. New Insights into Dihydrogenphosphate Recognition with Dirhenium(I) Tricarbonyl Complexes Bridged by a Thiourea Moiety. *RSC Adv.* **2014**, *4*, 18442–18452, doi:10.1039/C4RA00912F.
  22. Kang, Y.; Ito, A.; Sakuda, E.; Kitamura, N. Characteristic Spectroscopic and Photophysical Properties of Tricarbonyl Rhenium(I) Complexes Having Multiple Arylborane Charge Transfer Units. *Bull. Chem. Soc. Jpn.* **2017**, *90*, 574–585, doi:10.1246/bcsj.20160398.
  23. Kutal, C.; Weber, M.A.; Ferraudi, G.; Geiger, D. A Mechanistic Investigation of the Photoinduced Reduction of Carbon Dioxide Mediated by Tricarbonylbromo(2,2'-Bipyridine)Rhenium(I). *Organometallics* **1985**, *4*, 2161–2166, doi:10.1021/om00131a016.
  24. Probst, B.; Rodenberg, A.; Guttentag, M.; Hamm, P.; Alberto, R. A Highly Stable Rhenium–Cobalt System for Photocatalytic H<sub>2</sub> Production: Unraveling the Performance-Limiting Steps. *Inorg. Chem.* **2010**, *49*, 6453–6460, doi:10.1021/ic100036v.
  25. Palion-Gazda, J.; Szłapa-Kula, A.; Penkala, M.; Erfurt, K.; Machura, B. Photoinduced Processes in Rhenium(I) Terpyridine Complexes Bearing Remote Amine Groups: New Insights from Transient Absorption Spectroscopy. *Molecules* **2022**, *27*, 7147, doi:10.3390/molecules27217147.
  26. Klemens, T.; Świtlicka, A.; Szłapa-Kula, A.; Krompiec, S.; Lodowski, P.; Chrobok, A.; Godlewska, M.; Kotowicz, S.; Siwy, M.; Bednarczyk, K.; et al. Experimental and Computational Exploration of Photophysical and Electroluminescent Properties of Modified 2,2':6',2''-Terpyridine, 2,6-Di(Thiazol-2-Yl)Pyridine and 2,6-Di(Pyrazin-2-Yl)Pyridine Ligands and Their Re(I) Complexes. *Appl. Organomet. Chem.* **2018**, *32*, e4611, doi:10.1002/aoc.4611.
  27. Fernández-Terán, R.; Sévery, L. Living Long and Prosperous: Productive Intraligand Charge-Transfer States from a Rhenium(I) Terpyridine Photosensitizer with Enhanced

- Light Absorption. *Inorg. Chem.* **2021**, *60*, 1334–1343, doi:10.1021/acs.inorgchem.0c01939.
28. Fernández-Terán, R.J.; Sévery, L. Coordination Environment Prevents Access to Intraligand Charge-Transfer States through Remote Substitution in Rhenium(I) Terpyridinedicarbonyl Complexes. *Inorg. Chem.* **2021**, *60*, 1325–1333, doi:10.1021/acs.inorgchem.0c02914.
  29. Auvray, T.; Del Secco, B.; Dubreuil, A.; Zaccheroni, N.; Hanan, G.S. In-Depth Study of the Electronic Properties of NIR-Emissive  $\kappa$ 3N Terpyridine Rhenium(I) Dicarbonyl Complexes. *Inorg. Chem.* **2021**, *60*, 70–79, doi:10.1021/acs.inorgchem.0c02188.
  30. Saha, S.; Doughty, T.; Banerjee, D.; Patel, S.K.; Mallick, D.; Iyer, E.S.S.; Roy, S.; Mitra, R. Electrocatalytic Reduction of CO<sub>2</sub> to CO by a Series of Organometallic Re(I)-Tpy Complexes. *Dalton Trans.* **2023**, *52*, 15394–15411, doi:10.1039/D3DT00441D.
  31. Szlapa-Kula, A.; Małecka, M.; Maroń, A.M.; Janeczek, H.; Siwy, M.; Schab-Balcerzak, E.; Szalkowski, M.; Maćkowski, S.; Pedzinski, T.; Erfurt, K.; et al. In-Depth Studies of Ground- and Excited-State Properties of Re(I) Carbonyl Complexes Bearing 2,2':6',2''-Terpyridine and 2,6-Bis(Pyrazin-2-Yl)Pyridine Coupled with  $\pi$ -Conjugated Aryl Chromophores. *Inorg. Chem.* **2021**, *60*, 18726–18738, doi:10.1021/acs.inorgchem.1c02151.
  32. Małecka, M.; Szlapa-Kula, A.; Maroń, A.M.; Ledwon, P.; Siwy, M.; Schab-Balcerzak, E.; Sulowska, K.; Maćkowski, S.; Erfurt, K.; Machura, B. Impact of the Anthryl Linking Mode on the Photophysics and Excited-State Dynamics of Re(I) Complexes [ReCl(CO)<sub>3</sub>(4'-An-Terpy- $\kappa$ 2N)]. *Inorg. Chem.* **2022**, *61*, 15070–15084, doi:10.1021/acs.inorgchem.2c02160.
  33. Klemens, T.; Świtlicka, A.; Machura, B.; Kula, S.; Krompiec, S.; Łaba, K.; Korzec, M.; Siwy, M.; Janeczek, H.; Schab-Balcerzak, E.; et al. A Family of Solution Processable Ligands and Their Re(I) Complexes towards Light Emitting Applications. *Dyes Pigments* **2019**, *163*, 86–101, doi:10.1016/j.dyepig.2018.11.035.
  34. Małecka, M.; Machura, B.; Świtlicka, A.; Kotowicz, S.; Szafraniec-Gorol, G.; Siwy, M.; Szalkowski, M.; Maćkowski, S.; Schab-Balcerzak, E. Towards Better Understanding of Photophysical Properties of Rhenium(I) Tricarbonyl Complexes with Terpy-like Ligands. *Spectrochim. Acta. A. Mol. Biomol. Spectrosc.* **2020**, *231*, 118124, doi:10.1016/j.saa.2020.118124.
  35. Klemens, T.; Świtlicka-Olszewska, A.; Machura, B.; Grucela, M.; Janeczek, H.; Schab-Balcerzak, E.; Szlapa, A.; Kula, S.; Krompiec, S.; Smolarek, K.; et al. Synthesis, Photophysical Properties and Application in Organic Light Emitting Devices of Rhenium(I) Carbonyls Incorporating Functionalized 2,2':6',2''-Terpyridines. *RSC Adv.* **2016**, *6*, 56335–56352, doi:10.1039/C6RA08981J.
  36. Klemens, T.; Świtlicka-Olszewska, A.; Machura, B.; Grucela, M.; Schab-Balcerzak, E.; Smolarek, K.; Maćkowski, S.; Szlapa, A.; Kula, S.; Krompiec, S.; et al. Rhenium(I) Terpyridine Complexes – Synthesis, Photophysical Properties and Application in Organic Light Emitting Devices. *Dalton Trans.* **2016**, *45*, 1746–1762, doi:10.1039/C5DT04093K.
  37. Klemens, T.; Świtlicka, A.; Kula, S.; Siwy, M.; Łaba, K.; Grzelak, J.; Szalkowski, M.; Maćkowski, S.; Schab-Balcerzak, E.; Machura, B. The Effect of 2-, 3- and 4-Pyridyl Substituents on Photophysics of *Fac*-[ReCl(CO)<sub>3</sub>(n-Pytpy- $\kappa$ 2N)] Complexes: Experimental and Theoretical Insights. *J. Lumin.* **2019**, *209*, 346–356, doi:10.1016/j.jlumin.2019.01.045.
  38. Choroba, K.; Kotowicz, S.; Maroń, A.; Świtlicka, A.; Szlapa-Kula, A.; Siwy, M.; Grzelak, J.; Sulowska, K.; Maćkowski, S.; Schab-Balcerzak, E.; et al. Ground- and Excited-State Properties of Re(I) Carbonyl Complexes – Effect of Triimine Ligand Core

- and Appended Heteroaromatic Groups. *Dyes Pigments* **2021**, *192*, 109472, doi:10.1016/j.dyepig.2021.109472.
39. Wang, D.; Xu, Q.-L.; Zhang, S.; Li, H.-Y.; Wang, C.-C.; Li, T.-Y.; Jing, Y.-M.; Huang, W.; Zheng, Y.-X.; Accorsi, G. Synthesis and Photoluminescence Properties of Rhenium(I) Complexes Based on 2,2':6',2''-Terpyridine Derivatives with Hole-Transporting Units. *Dalton Trans.* **2013**, *42*, 2716–2723, doi:10.1039/C2DT32154H.
  40. Klemens, T.; Świtlicka, A.; Szlapa-Kula, A.; Łapok, Ł.; Obłóza, M.; Siwy, M.; Szalkowski, M.; Maćkowski, S.; Libera, M.; Schab-Balcerzak, E.; et al. Tuning Optical Properties of Re(I) Carbonyl Complexes by Modifying Push–Pull Ligands Structure. *Organometallics* **2019**, *38*, 4206–4223, doi:10.1021/acs.organomet.9b00517.
  41. Li, Y.; Lu, N.; Lin, Q.; Wang, H.; Liang, Z.; Lu, Y.; Zhang, P. Sono-ReCORMs for Synergetic Sonodynamic-Gas Therapy of Hypoxic Tumor. *Chin. Chem. Lett.* **2023**, *34*, 107653, doi:10.1016/j.cclet.2022.06.076.
  42. Choroba, K.; Maroń, A.; Świtlicka, A.; Szlapa-Kula, A.; Siwy, M.; Grzelak, J.; Maćkowski, S.; Pedzinski, T.; Schab-Balcerzak, E.; Machura, B. Carbazole Effect on Ground- and Excited-State Properties of Rhenium(I) Carbonyl Complexes with Extended Terpy-like Ligands. *Dalton Trans.* **2021**, *50*, 3943–3958, doi:10.1039/D0DT04340K.
  43. Laramée-Milette, B.; Lachance-Brais, C.; Hanan, G.S. Synthesis of Discrete Re(I) Di- and Tricarbonyl Assemblies Using a [4 × 1] Directional Bonding Strategy. *Dalton Trans.* **2014**, *44*, 41–45, doi:10.1039/C4DT03077J.
  44. Amoroso, A.J.; Banu, A.; Coogan, M.P.; Edwards, P.G.; Hossain, G.; Malik, K.M.A. Functionalisation of Terpyridine Complexes Containing the Re(CO)<sub>3</sub><sup>+</sup> Moiety. *Dalton Trans.* **2010**, *39*, 6993–7003, doi:10.1039/C0DT00174K.
  45. Metcalfe, C.; Spey, S.; Adams, H.; Thomas, J.A. Extended Terpyridyl and Triazine Complexes of D6-Metal Centres. *J. Chem. Soc. Dalton Trans.* **2002**, 4732–4739, doi:10.1039/B208211J.
  46. Laramée-Milette, B.; Zaccheroni, N.; Palomba, F.; Hanan, G.S. Visible and Near-IR Emissions from k<sub>2</sub>N- and k<sub>3</sub>N-Terpyridine Rhenium(I) Assemblies Obtained by an [N×1] Head-to-Tail Bonding Strategy. *Chem. – Eur. J.* **2017**, *23*, 6370–6379, doi:10.1002/chem.201700077.
  47. Mansour, A.M.; Radacki, K.; Shehab, O.R. Role of the Ancillary Ligand in Controlling the Lysozyme Affinity and Electronic Properties of Terpyridine Fac-Re(CO)<sub>3</sub> Complexes. *Dalton Trans.* **2021**, *50*, 1197–1201, doi:10.1039/D0DT04140H.
  48. Mansour, A.M.; Radacki, K. Terpyridine Based ReX(CO)<sub>3</sub> Compounds (X = Br<sup>–</sup>, N<sub>3</sub><sup>–</sup> and Triazolate): Spectroscopic and DFT Studies. *Polyhedron* **2021**, *194*, 114954, doi:10.1016/j.poly.2020.114954.
  49. Frenzel, B.A.; Schumaker, J.E.; Black, D.R.; Hightower, S.E. Synthesis, Spectroscopic, Electrochemical and Computational Studies of Rhenium(I) Dicarbonyl Complexes Based on Meridionally-Coordinated 2,2':6',2''-Terpyridine. *Dalton Trans.* **2013**, *42*, 12440–12451, doi:10.1039/C3DT51251G.
  50. Black, D.R.; Hightower, S.E. Preparation and Characterization of Rhenium(I) Dicarbonyl Complexes Based on the Meridionally-Coordinated Terpyridine Ligand. *Inorg. Chem. Commun.* **2012**, *24*, 16–19, doi:10.1016/j.inoche.2012.07.034.
  51. Juris, A.; Campagna, S.; Bidd, I.; Lehn, J.M.; Ziessel, R. Synthesis and Photophysical and Electrochemical Properties of New Halotricarbonyl(Polypyridine)Rhenium(I) Complexes. *Inorg. Chem.* **1988**, *27*, 4007–4011, doi:10.1021/ic00295a022.
  52. Ismail, M.B.; Booysen, I.N.; Hosten, E.; Akerman, M.P. Synthesis, Characterization and DNA Interaction Studies of Tricarbonyl Rhenium(I) Compounds Containing Terpyridine



- Schiff Base Chelates. *J. Organomet. Chem.* **2017**, 833, 1–9, doi:10.1016/j.jorganchem.2017.01.017.
53. Thorp-Greenwood, F.L.; Pritchard, V.E.; Coogan, M.P.; Hardie, M.J. Tris(Rhenium Fac-Tricarbonyl) Polypyridine Functionalized Cyclotriguaiacylene Ligands with Rich and Varied Emission. *Organometallics* **2016**, 35, 1632–1642, doi:10.1021/acs.organomet.6b00099.
  54. Coogan, M.P.; Fernández-Moreira, V.; Kariuki, B.M.; Pope, S.J.A.; Thorp-Greenwood, F.L. A Rhenium Tricarbonyl 4'-Oxo-Terpy Trimer as a Luminescent Molecular Vessel with a Removable Silver Stopper. *Angew. Chem. Int. Ed.* **2009**, 48, 4965–4968, doi:10.1002/anie.200900981.
  55. Ge, Q.; Corkery, T.C.; Humphrey, M.G.; Samoc, M.; Hor, T.S.A. Organobimetallic RuII–ReI4-Ethynylpyridyl Complexes: Structures and Non-Linear Optical Properties. *Dalton Trans.* **2009**, 6192–6200, doi:10.1039/B902800E.
  56. Zheng, Z.-B.; Wu, Y.-Q.; Wang, K.-Z.; Li, F. pH Luminescence Switching, Dihydrogen Phosphate Sensing, and Cellular Uptake of a Heterobimetallic Ruthenium(II)–Rhenium(I) Complex. *Dalton Trans.* **2014**, 43, 3273–3284, doi:10.1039/C3DT52568F.
  57. Suzuki, M.; Uehara, T.; Arano, Y.; Hoshino, T.; Neya, S. Fabrications of Potential Imaging Probes Based on a  $\beta$ -Alkyl Substituted Porphyrin with a Terpyridine External Coordination Site. *Tetrahedron Lett.* **2011**, 52, 7164–7167, doi:10.1016/j.tetlet.2011.10.132.
  58. Lang, P.; Pfrunder, M.; Quach, G.; Braun-Cula, B.; Moore, E.G.; Schwalbe, M. Sensitized Photochemical CO<sub>2</sub> Reduction by Hetero-Pacman Compounds Linking a ReI Tricarbonyl with a Porphyrin Unit. *Chem. – Eur. J.* **2019**, 25, 4509–4519, doi:10.1002/chem.201806347.
